# Supplementary material for: The solution structure of Dead End bound to AU-rich RNA reveals an unusual mode of tandem RRM-RNA recognition required for mRNA regulation
Source: PubMed Central journal article supplement (PMC9537309; doi:10.1038/s41467-022-33552-x), 2022-10-06
Supplement: 41467_2022_33552_MOESM1_ESM.pdf [file 41467_2022_33552_MOESM1_ESM.pdf]

## **Supplementary Information**

### **The solution structure of Dead End bound to AU-rich RNA reveals an unusual mode of tandem RRM-RNA recognition required for mRNA regulation**

#### **Authors**

Malgorzata M. Duszczyk, Harry Wischnewski, Tamara Kazeeva, Rajika Arora, Fionna E. Loughlin, Christine von Schroetter, Ugo Pradère, Jonathan Hall, Constance Ciaudo, Frédéric H.-T. Allain

## Supplementary Figure 1

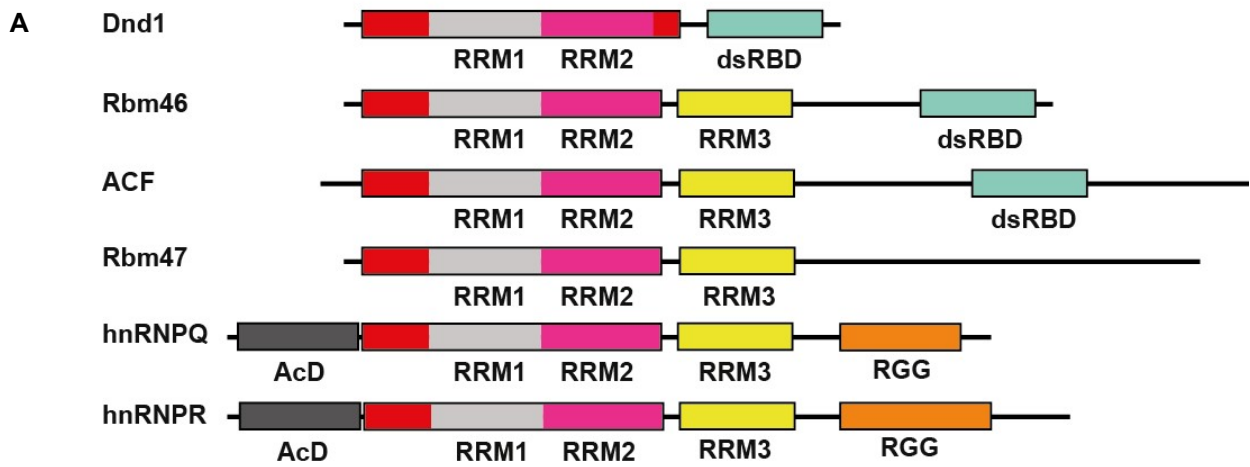

**B**

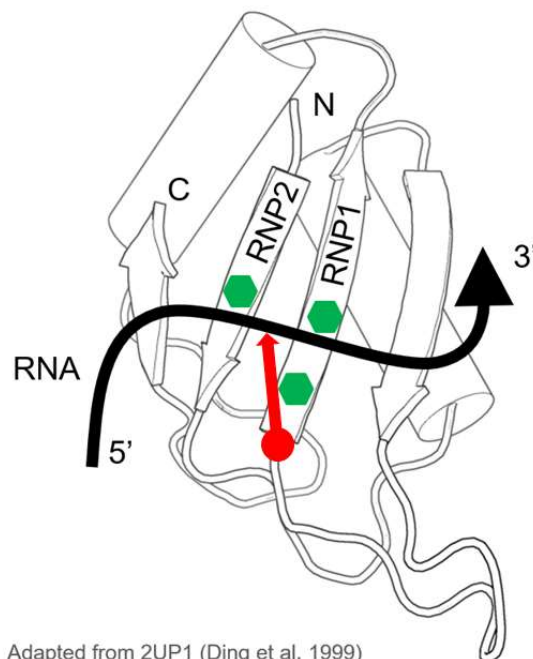

RNP1 on  $\beta 3$  [R/K]-G-[F/Y]-[G/A]-[F/Y]-[I/L/V]-X-[F/Y]

DND1: R98-G-F100-A-Y102-A-R-Y

RNP2 on  $\beta 1$  [I/L/V]-[F/Y]-[I/L/V]-X-N-L

DND1: V-F61-I-G-R-L

C

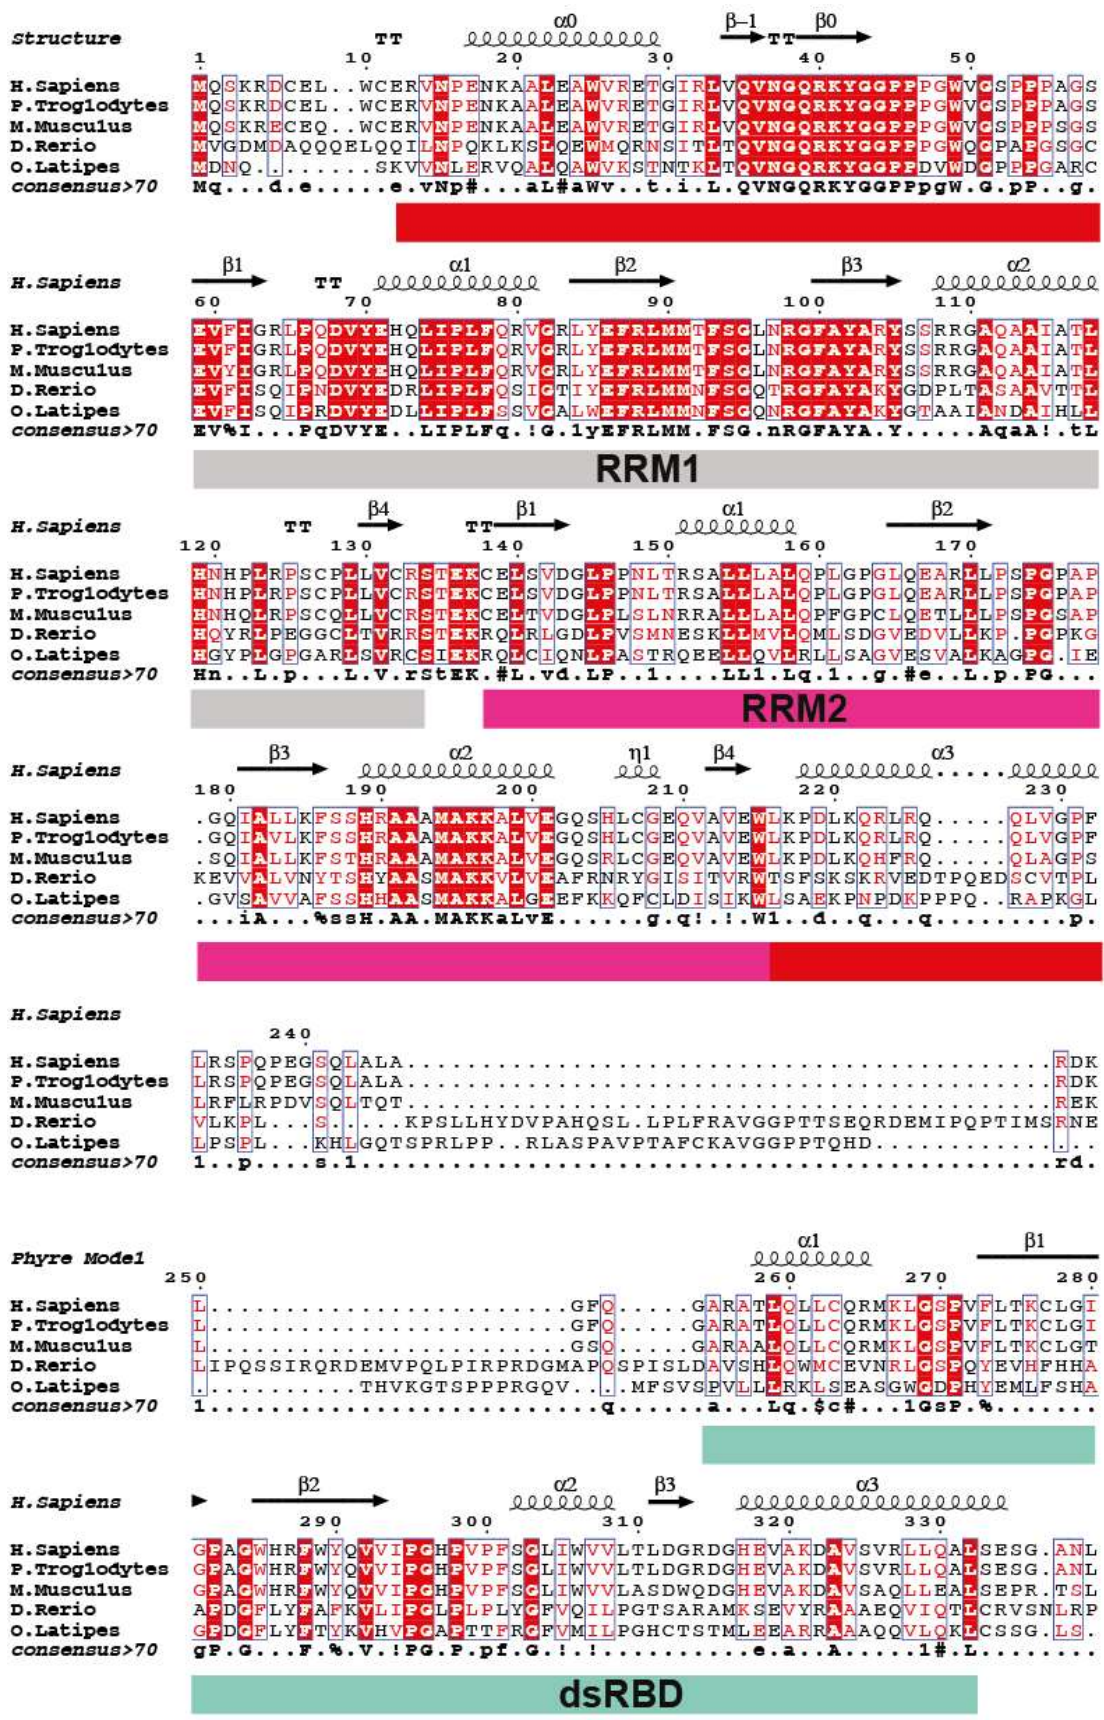

D

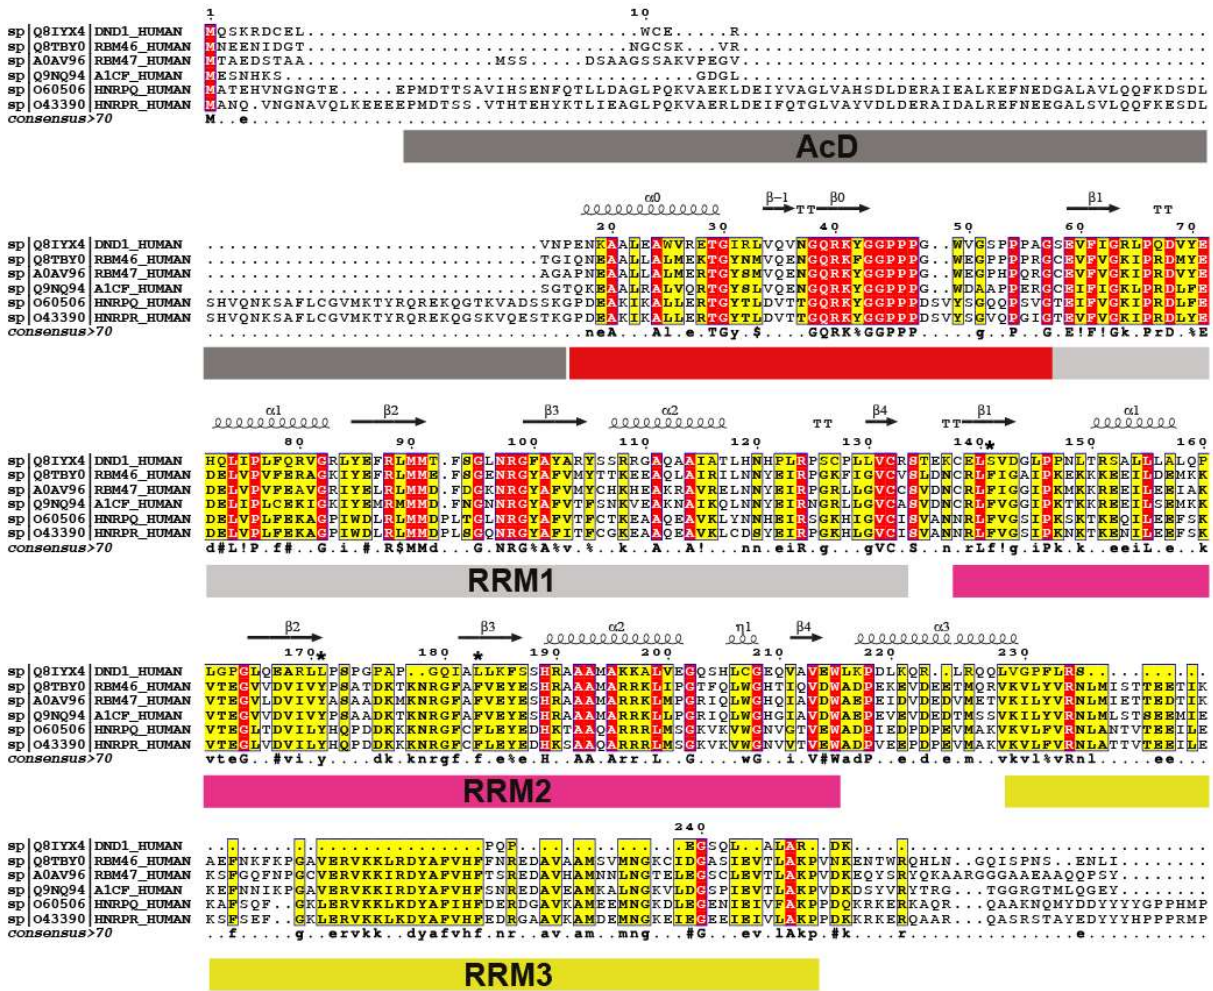

E

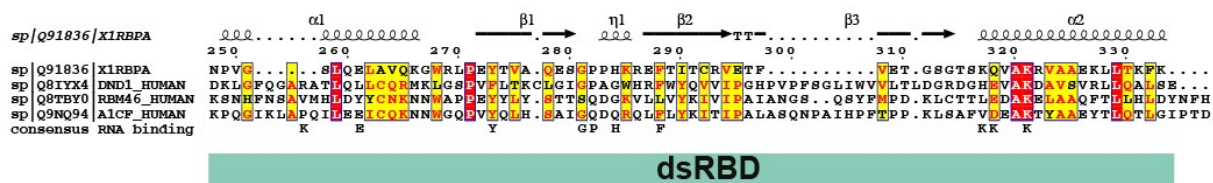

Supplementary Figure 1. Related to Figure 1.

A) Domain structures of the hnRNPR-like family of proteins that share sequence similarity to DND1 in its tandem RRM, including the N-terminal extension. hnRNPQ and hnRNPR share a conserved N-terminal Acidic Domain (AcD) and C-terminal RGG repeats (Supplementary Fig. 1C). DND1, RBM46 and ACF share a dsRBD with low sequence conservation. Unique to DND1 is the lack of a third RRM, highly conserved in the other family members and lack of a canonical RNP RNA binding surface on RRM2. See Supplementary Fig. 1C for sequence alignments.

**B) Schematic view of a canonical RRM** adapted from PDBID 2UP1 <sup>1</sup>. The canonical RRM fold is  $\beta\alpha\beta\beta\alpha\beta$  folded into a four-stranded beta-sheet packed on top of two alpha-helices. The canonical RNA binding is of single-stranded RNA 5' to 3' over the beta-sheet starting at  $\beta 4$  towards  $\beta 2$ . The central two beta-strands contain two conserved sequences RNP1 on  $\beta 3$  [R/K]-G-[F/Y]-[G/A]-[F/Y]-[I/L/V]-X-[F/Y] and RNP2 on  $\beta 1$  [I/L/V]-[F/Y]-[I/L/V]-X-N-L with three exposed aromatic sidechains (in green), two of which accommodate two bases by stacking interactions. In DND1 RRM1 these are F61 and Y102. A third aromatic sidechain (F100 in DND1 RRM1) usually stacks between the two ribose-moieties of these two nucleotides and an exposed long positively charged sidechain (in red) stabilizes the phosphate backbone between them. In DND1 RRM1 this is residue R98 that was mutated in the RIP assay (Fig. 1B, Supplementary Fig. 2).

**C) Sequence alignment of DND1** from human (Uniprot Q8IYX4, RefSeq NP919225.1), chimp (Uniprot H2QRM7, RefSeq XP\_517978.2), mouse (Uniprot Q6VY05, RefSeq NP\_775559.2), zebrafish (Uniprot Q7T1H5, RefSeq NP\_997960.1) and medaka (Uniprot C7DQU6, RefSeq NP\_001157988.1), prepared with the programs T-Coffee <sup>2</sup> and ESPript 3.0 <sup>3</sup>. Phylogenetic analysis reveals a high level of conservation between species within the RNA binding domains RRM1, RRM2 and dsRBD but also the N-terminal extension of RRM1 ( $\alpha 0$ ,  $\beta -1$  &  $\beta 0$ ). Residues important for the interaction or discussed in the text are numbered according to the human protein sequence. Above the sequence alignment are the secondary structure elements based on either the tandem RRM12 structure presented in this paper or a model of the dsRBD calculated by the program PHYRE2 <sup>4</sup> based on PDB entry 2L2N. Beta-turns are annotated by 'TT'. Below is a consensus sequence using the following criteria: uppercase is identity, lowercase is consensus level > 0.7, ! is any of I/V, \$ is any of L/M, % is any of F/Y, # is any of N/D/Q/E/B/Z. Colors and boxes are displayed on the alignment according to similarity scores calculated using ESPript 3.0 <sup>3</sup>: Red box, white character = Strict identity, Red character = Similarity higher than 0.7, Blue frame = Similarity of stretch of residues higher than 0.7.

**D) Sequence alignment of the N-terminal parts of the human hnRNPR-like family of RNA-binding proteins** DND1, RBM46, RBM47, ACF, hnRNPQ and hnRNPR. Uniprot identifiers are indicated in front of the protein names. Alignment was prepared as described in Supplementary Fig. 1C. Non-canonical RNP residues in DND1 are indicated with an asterix above the sequence.

**E) Sequence alignment of the dsRBDs of the human hnRNPR-like family of RNA-binding proteins** DND1, RBM46 and ACF with the canonical second dsRBD of the protein XIRBPA with its secondary structure elements displayed above the sequence as found in PDBID 1DI2 <sup>5</sup>. Canonical dsRBD RNA binding residues are indicated below the sequence. Numbering according to DND1.

## Supplementary Figure 2

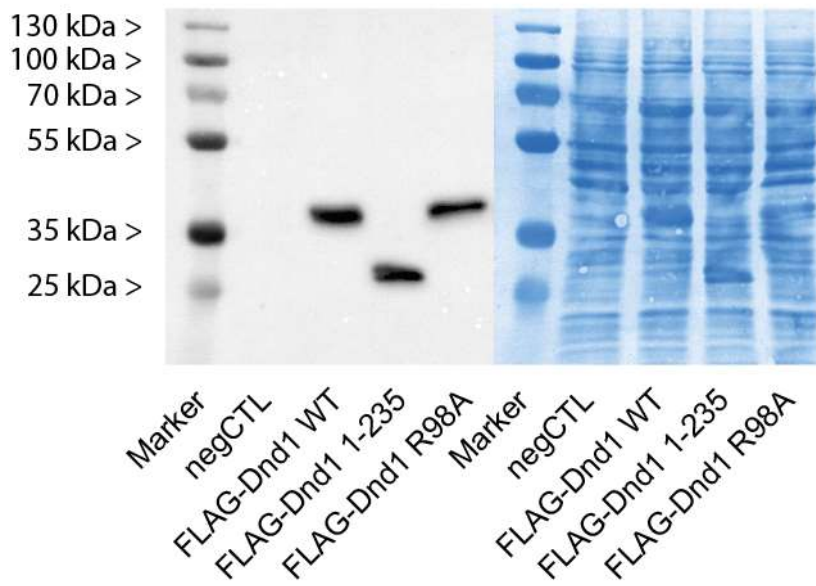

**Supplementary Figure 2. Related to Figure 1B. Expression in HEK293T cell culture.** Immunostaining with anti-FLAG antibody shows that DND1 and all mutants are well expressed in HEK293T cell culture. Western blot on the left, Coomassie staining of the same gel on the right. Source data are provided as a Source Data file. Western blots and Coomassie staining were performed on 7 independent transfections: twice to check protein stability and 5 times in 5 independent RIP experiments.

Supplementary Figure 3

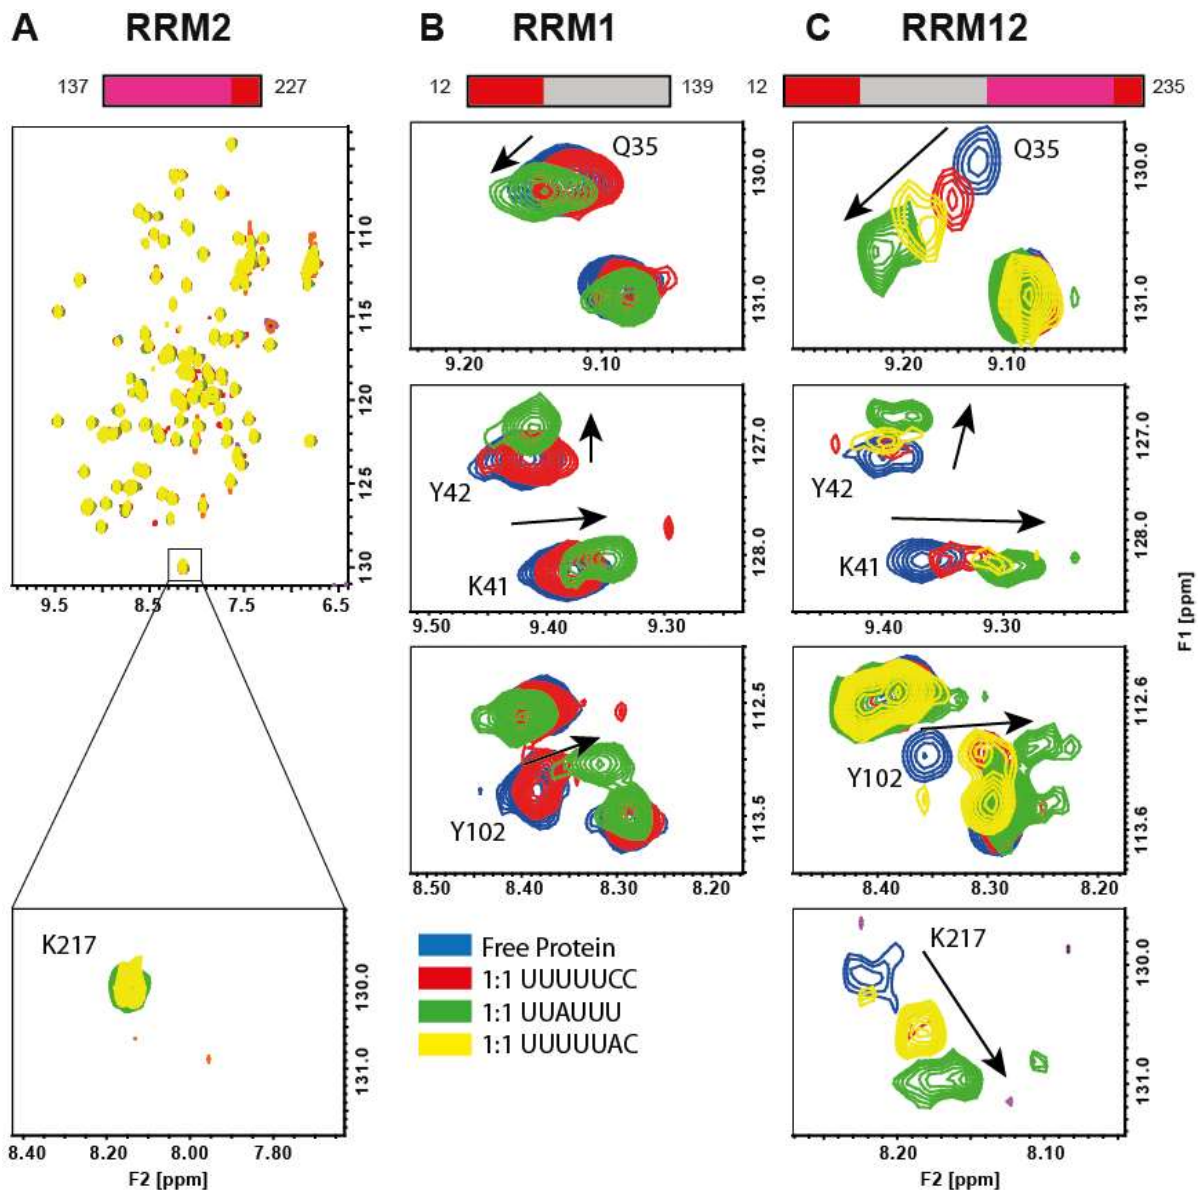

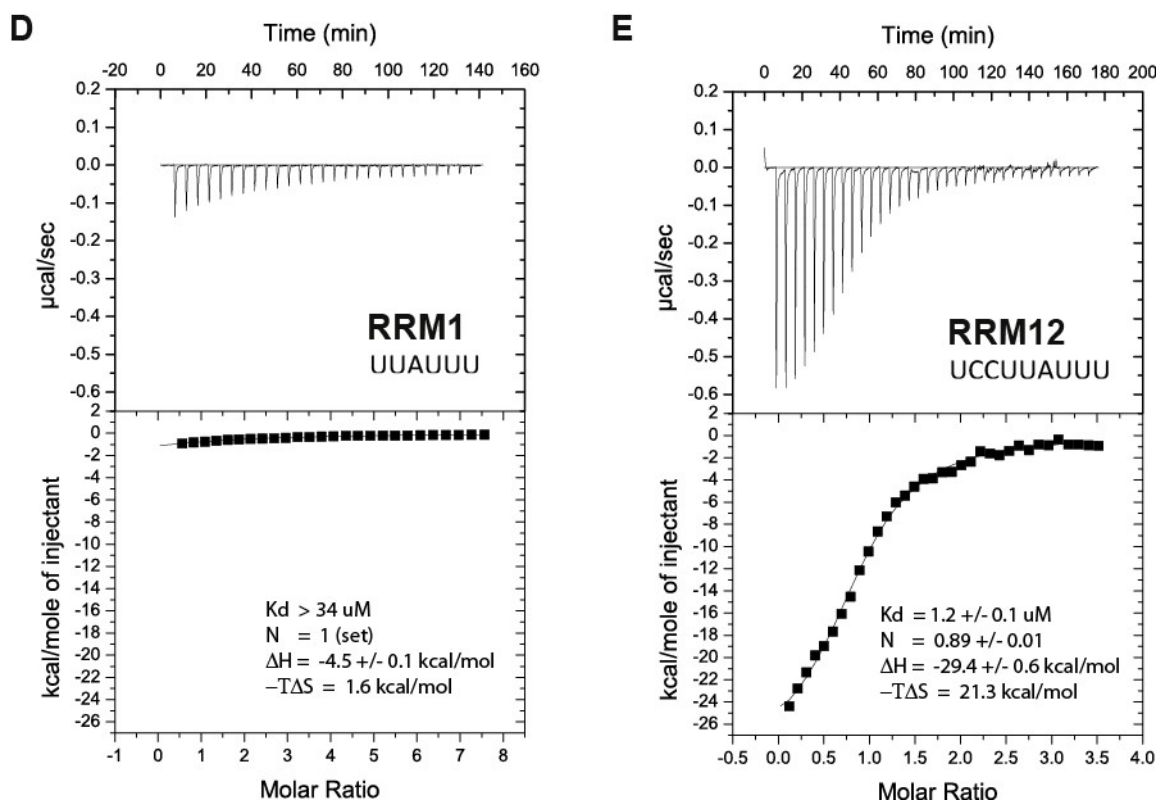

**Supplementary Figure 3. Related to Figure 2. Finding the right protein construct and high affinity target for DND1-RNA structure determination using NMR titrations and ITC.**

**A/B/C) Overlay of free and RNA-bound  $^1\text{H}$ - $^{15}\text{N}$ -HSQC spectra of DND1**

**A) RRM2** includes a conserved C-terminal extension (137-227), full spectrum (top) and magnification of the individual cross-peak of the representative backbone amide of residue K217 in RRM2 alpha-helix 2

**B) RRM1** includes a conserved N-terminal extension (12-139), magnification of residues Q35, K41 and Y42 in the N-terminal extension and Y102 in RNP1.

**C) RRM12** is the tandem RRM including both extensions (12-235), magnification of Q35, K41, Y42 and K217. The free protein spectra are shown in blue, spectra of a 1:1 molar equivalent complex with the oligos UUUUCC, UUAUUU and UUUUUAC in red, green and yellow respectively. RRM2 alone does not bind any of the oligos. The arrows show increasing chemical shift perturbations upon introduction of an adenine into the oligo. Largest perturbations, indicative of higher affinity binding, are seen upon addition of an RNA oligo containing a central adenosine to the tandem RRM construct. Although the oligo UUAUUU including a central adenine can bind RRM1 alone, it shifts the signals originating from the bound residues to much lesser extent than when bound to the tandem RRM12, reflecting an increase in binding affinity upon addition of RRM2 as is confirmed by ITC in Figure 2 in the main text. A U-rich oligo not containing adenines at all (UUUUCC) is not bound by RRM1 alone. This oligo, as well as an



oligo with a peripheral adenine (UUUUUAC), is bound by the tandem RRM12 construct, although shifting the RNA bound residues to a lesser extent reflecting a weaker affinity. These titrations show that the affinity of DND1's tandem RRMs is highest to UUAUUU > UUUUUAC > UUUUUCC. NMR conditions: protein concentrations between 0.1 and 0.2mM, 298K, 750MHz. NMR buffer: 20mM MES pH 6.6, 100 mM NaCl, except for the RRM2 spectra recorded at 600MHz, in 25mM K<sub>2</sub>HPO<sub>4</sub> / KH<sub>2</sub>PO<sub>4</sub> buffer, 25mM NaCl, 2mM DTT pH6.3 at 303K.

**D/E) Additional ITC binding experiments of RRM1 (D) and the tandem RRM12 (E) to AU-rich RNA** show that when both domains are present, the affinity to AU-rich RNA is greatly increased compared to RRM1 alone. A titration with a longer AU-rich RNA (D) shows that an extension of the RNA at the 5' end around the central adenosine as was present in U-rich region 1 (URR1) targeted by DND1 in the p27/CDKN1B 3'UTR described by Kedde et al. <sup>6</sup> does not increase affinity for RRM12 binding (see also Supplementary Table 2).

# Supplementary Figure 4

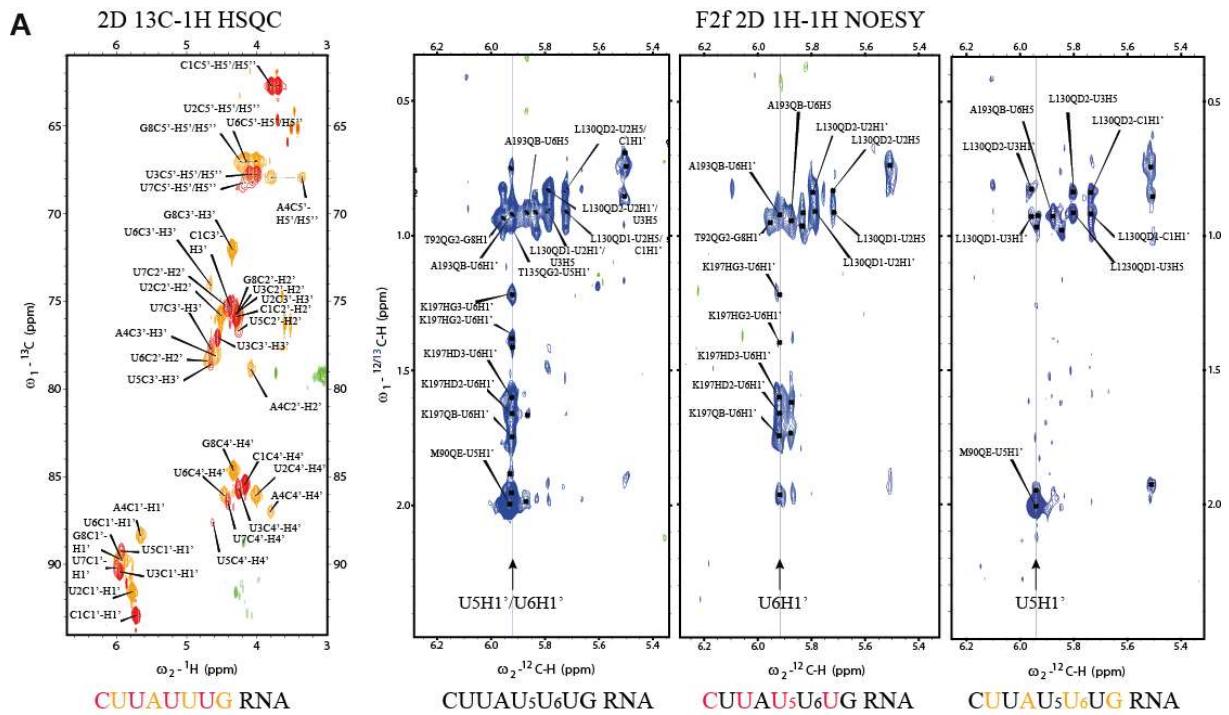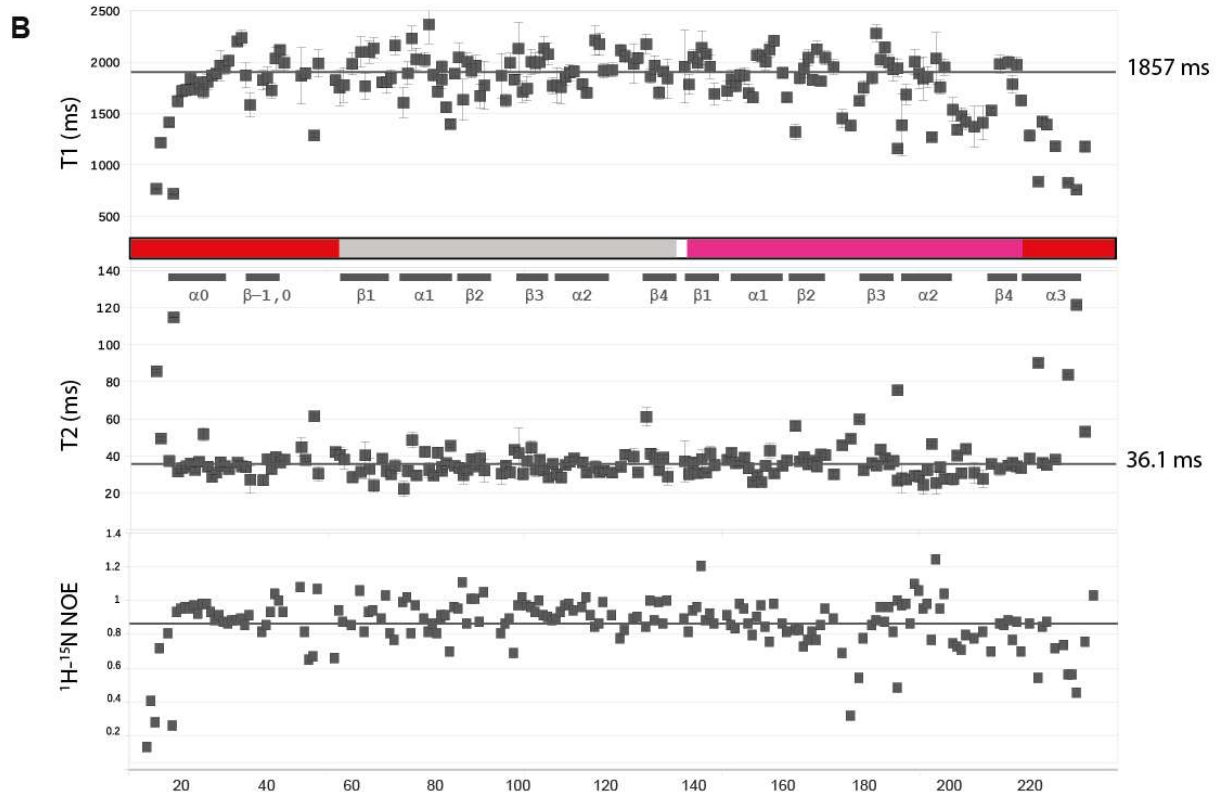

#### Supplementary Figure 4. Related to Figure 3. NMR data DND1 RRM12-CUUAUUUG complex

**A) Selective  $^{13}\text{C}$ -ribose labeling was essential for solving the structure of the DND1 tandem RRM – CUUAUUUG complex.** Solid phase synthesis using ribose- $^{13}\text{C}$  labeled phosphoramidites facilitated the synthesis of short RNA oligos with alternating ribose moieties labeled with the NMR active nucleus  $^{13}\text{C}$ . Overlay of 2D  $^1\text{H}$ - $^{13}\text{C}$ -HSQC spectra of CUUAUUUG RNA  $^{13}\text{C}$  ribose-labeled in either the 1<sup>st</sup>, 3<sup>rd</sup>, 5<sup>th</sup> and 7<sup>th</sup> (in red) or 2<sup>nd</sup>, 4<sup>th</sup>, 6<sup>th</sup> and 8<sup>th</sup> (in yellow) nucleotide position, in complex with the unlabeled tandem RRMs of DND1. Assignment of the heavily overlapped ribose protons is facilitated by resolution in the  $^{13}\text{C}$  dimension and reduction of assignment possibilities due to the selective labeling B) Excerpts of 2D NOESY spectra of complexes between the DND1  $^{13}\text{C}/^{15}\text{N}$ -labeled tandem RRMs and either unlabeled or selectively  $^{13}\text{C}$ -ribose labeled CUUAUUUG RNA,  $^{13}\text{C}$  filtered in the F2 dimension (F2f). Cross-peaks represent short distances (under 5 Ångstrom) between protons attached to unlabeled carbons only in the F2 dimension (in this case RNA base and unlabeled ribose) and protons attached to both  $^{13}\text{C}$ -labeled carbons (all protein and RNA labeled ribose) and unlabeled carbons (RNA base and unlabeled ribose) in F1. The arrow indicates the frequency at which both the U<sub>5</sub> and U<sub>6</sub> H1' protons resonate. By selectively labeling the U<sub>5</sub> ribose the cross-peaks to its H1' can be suppressed with a  $^{13}\text{C}$ -filter thus revealing NOEs specific to the U<sub>6</sub> ribose whereas a sample incorporating  $^{13}\text{C}$ -labeled U<sub>6</sub> ribose allows detection of NOEs to U<sub>5</sub>, making unambiguous assignment of the short distances between the protein sidechains and the U<sub>5</sub> and U<sub>6</sub> H1' protons possible.

**B) Backbone dynamics of the DND1 tandem RRM-CUUAUUUG complex.**  $^{15}\text{N}$ -T1 and  $^{15}\text{N}$ -T2 relaxation rates and heteronuclear  $\{^1\text{H}\}$ - $^{15}\text{N}$  NOEs (HetNOE) were measured by standard techniques described in the Method details and are plotted against the protein sequence where RRM1 is shown in grey, RRM2 in pink and the N- and C-terminal extensions are in red. Secondary structure elements are indicated below the sequence. Data are presented as mean +/- SD of the relaxation rates. SD was estimated by Monte-Carlo error analysis (21 simulations), using the errors in the peak intensities with automated estimation of the spectral noise (non-linear least squares fit to a mono-exponential decay using modelXY in NMRPipe <sup>7</sup>). Similar T1/T2 ratios for both RRMs including the N-terminal extension suggest isotropic motion, except for the unfolded N-terminal tail, the C-terminal  $\alpha$ 3-helix and several loop residues. The average values of T2 and T1 of all residues with these exceptions indicated by solid lines are consistent with a globular protein of approximately 30 kDa. This is consistent with the size of a monomeric DND1 tandem RRM-CUUAUUUG complex determined by extrapolating from the correlation of  $\tau_c$  and MW recorded at the same temperature (298K) and a similar field strength <sup>8</sup>. A rotational correlation time ( $\tau_c$ ) of 18ns was estimated using the formula

$$\tau_c \approx \left( \sqrt{\frac{6T_1}{T_2} - 7} \right) / 4\pi\nu_N$$

derived from Eq. 8 in Kay et al. <sup>9</sup> which considers only the contributions of  $J(0)$  and  $J(\omega_N)$  spectral density terms to T1 and T2 relaxation, neglecting higher frequency terms, and where  $\nu_N$  is the  $^{15}\text{N}$  resonance frequency (76,01 MHz). Source data are provided as a Source Data file.

## Supplementary Figure 5

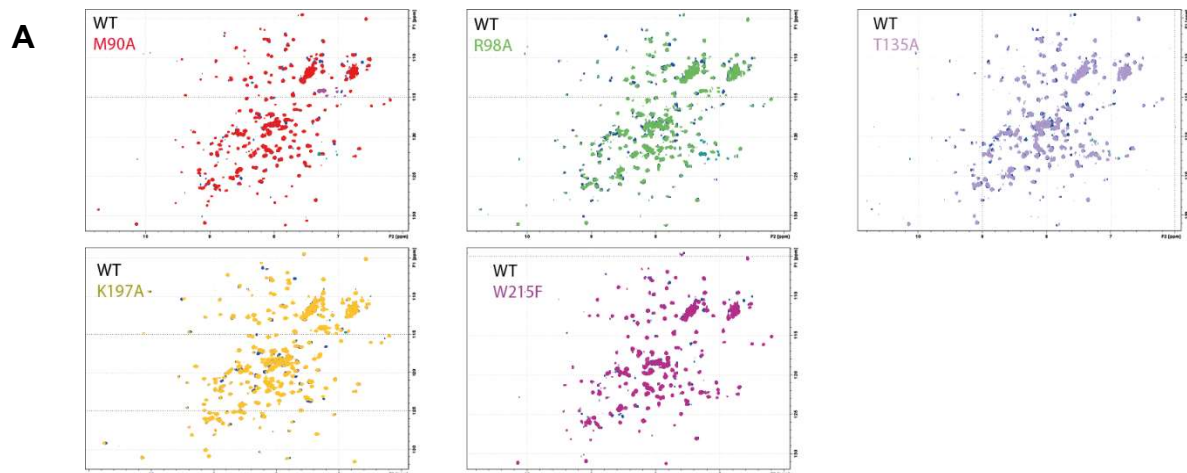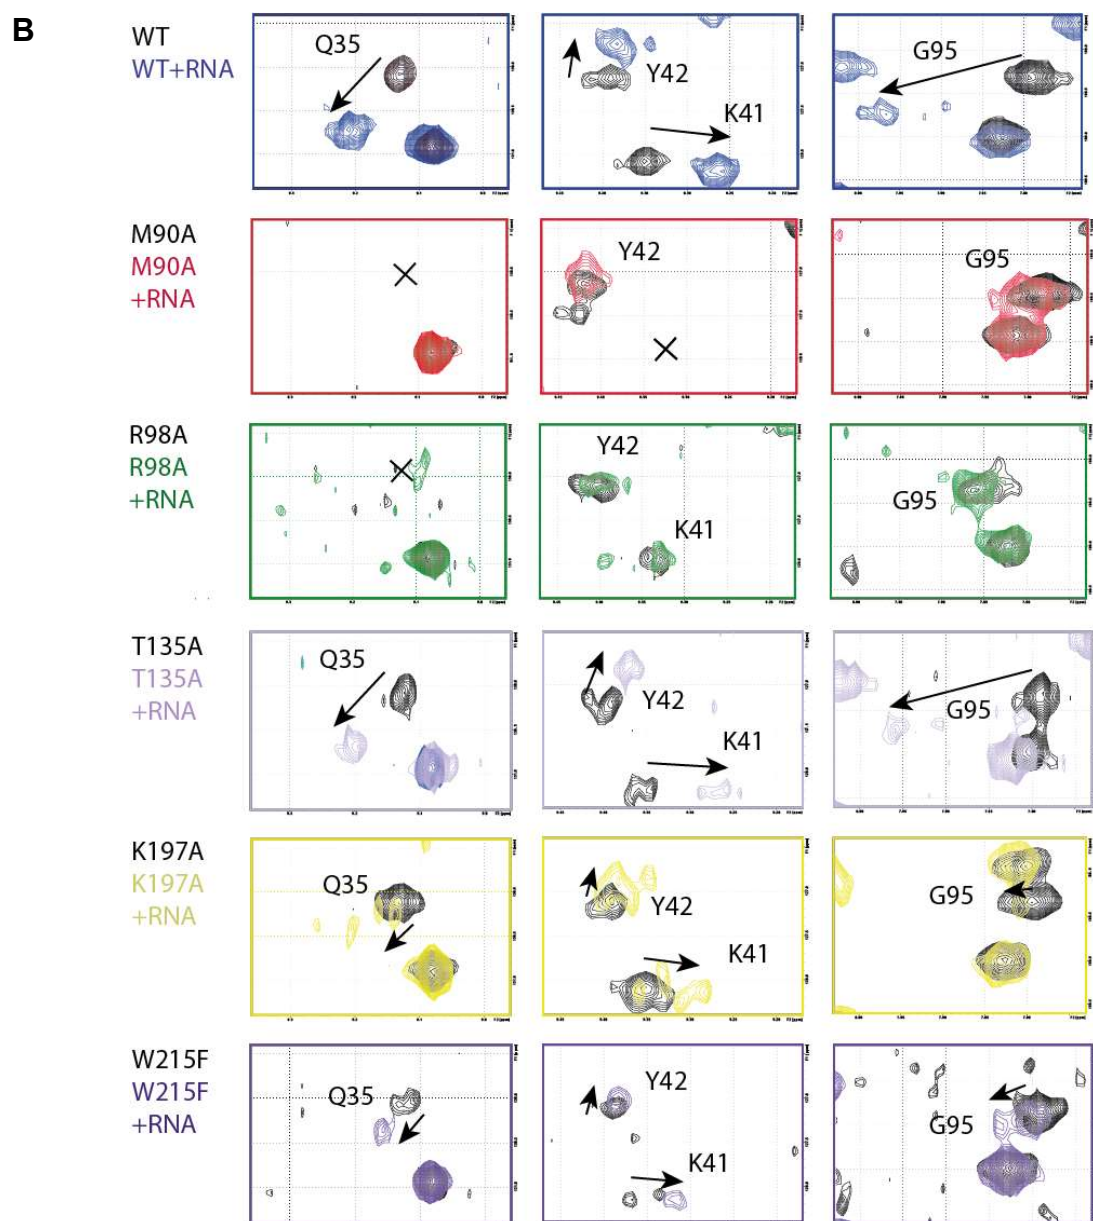

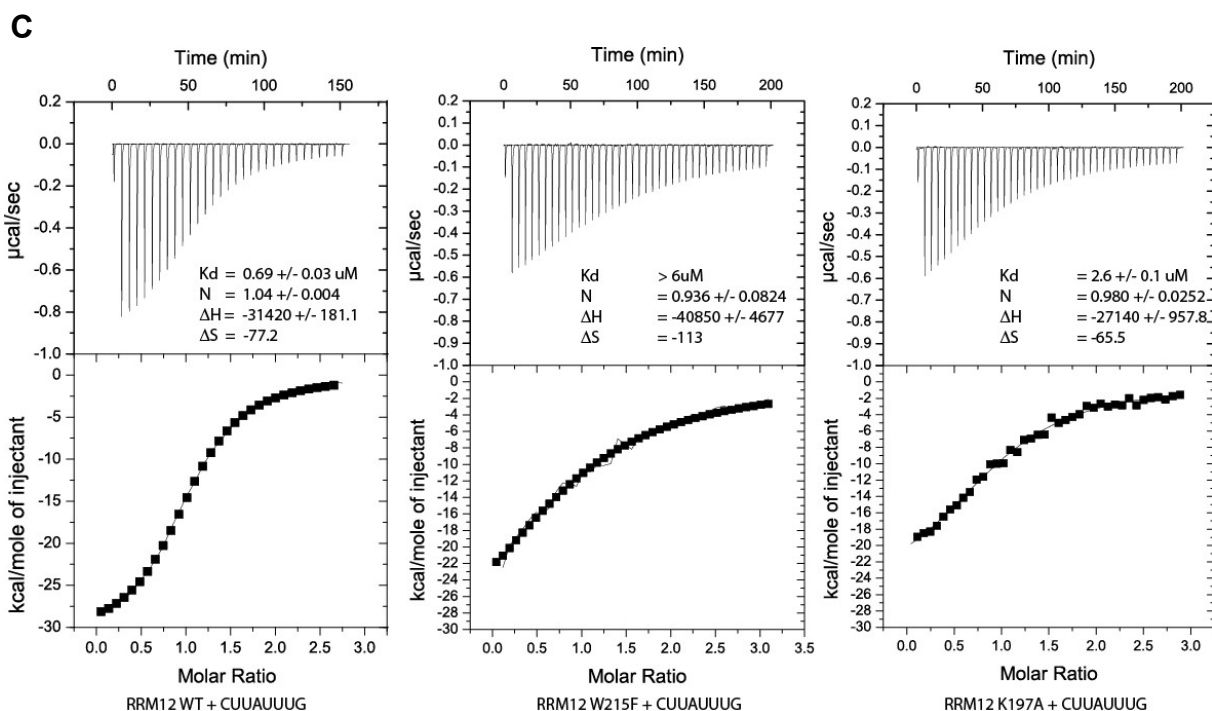

**Supplementary Figure 5. Related to Figure 4. Mutational analysis of DND1 tandem RRM binding to CUUAAUUUG RNA.**

**A)**  $^1\text{H}$ - $^{15}\text{N}$  HSQC spectra of the WT tandem RRMs of DND1 are overlaid individually with the mutants M90A, R98A, T135A, K197A and W215F and show that all these mutants are correctly folded

**B)** Disappearance or diminishing of chemical shift perturbations upon titration of CUUAAUUUG RNA to several mutants compared to the WT tandem RRMs is observed for several reporter residues.

**C)** ITC measurement of DND1's tandem RRMs domain titrated with CUUAAUUUG RNA. WT:  $N = 1.04 \pm 0.004$ ;  $K_D = 0.69 \pm 0.03 \mu\text{M}$ ;  $\Delta H = -31.4 \pm 0.2 \text{ kcal/mol}$ ;  $-T\Delta S = 23.0 \text{ kcal/mol}$ ; W215F:  $N = 0.919 \pm 0.172$ ;  $K_D = > 10 \mu\text{M}$ ;  $\Delta H = -68 \pm 15 \text{ kcal/mol}$ ;  $-T\Delta S = 61.4 \text{ kcal/mol}$ ; K197A:  $N = 0.98 \pm 0.03$ ;  $K_D = 2.6 \pm 0.1 \mu\text{M}$ ;  $\Delta H = -27.1 \pm 1.0 \text{ kcal/mol}$ ;  $-T\Delta S = 19.5 \text{ kcal/mol}$ .

**Supplementary Figure 6**

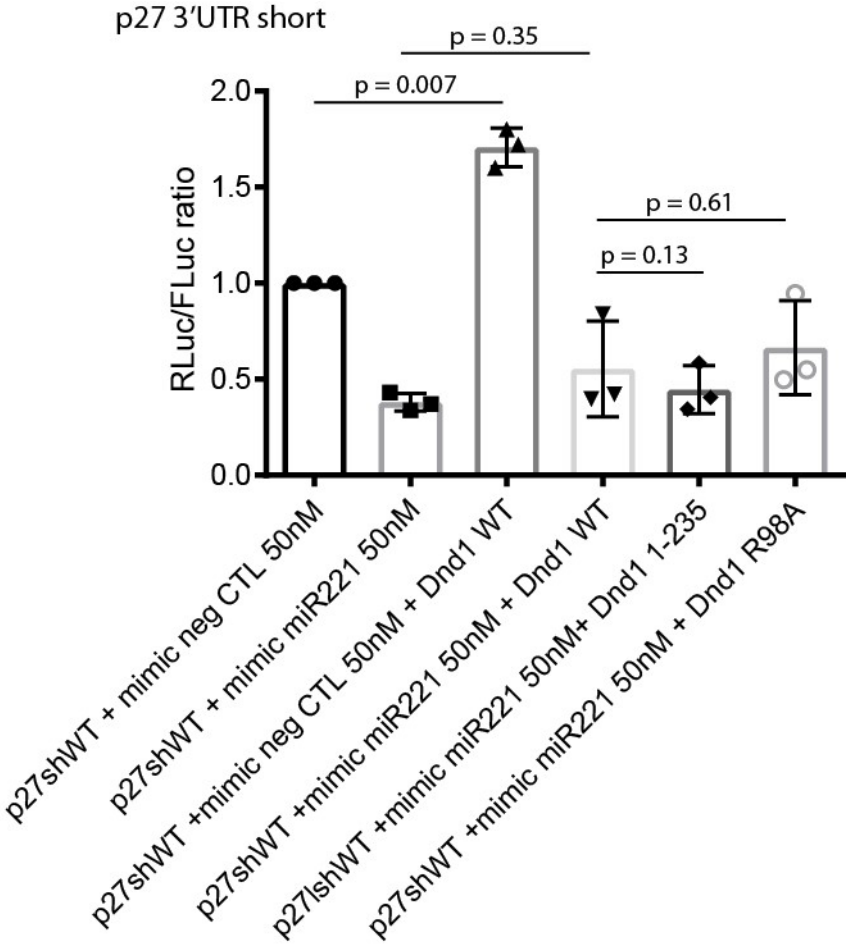

**Supplementary Figure 6. Related to Figure 5. DND1 increases p27 3'UTR controlled reporter gene expression independent of the presence of a miR-mimic targeting this UTR or a negative control.** A MiRIDIAN 221-3p miRNA mimic or negative control mimic was cotransfected into HEK293T with a short p27 UTR psiCHECK-2 luciferase construct and either WT or mutant FLAG-tagged DND1. Relative luciferase activity is the ratio between Renilla control and Firefly luciferases, adjusted to 1 for 100%. The results are represented as means and SD from three independent experiments. p-values obtained from two-tailed Welch's t-test. Source data are provided as a Source Data file.

## Supplementary Figure 7

### A) Proteins enriched in DND1 WT vs R98A RNA binding mutant interactome:

(DND1) ELAVL1, HNRNPL, PHAX, DHX30, PABPC1, SYNCRIP, MATR3, MOV10, MEX3A, TNRC6B, DHX9, HNRNPA2B1, LARP1, ILF3, SART3, HNRNPC, FUBP3

GO Biological Process 2018 ranked by EnrichR <sup>10</sup> combined score:

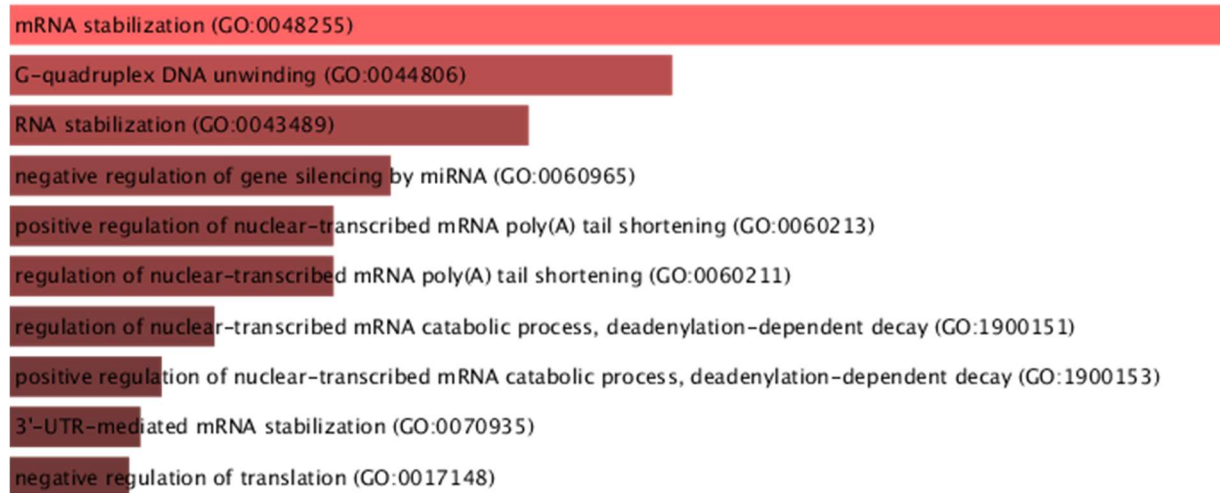

| Index | Name                                                                                                          | P-value    | Adjusted p-value | Odds Ratio | Combined score |
|-------|---------------------------------------------------------------------------------------------------------------|------------|------------------|------------|----------------|
| 1     | mRNA stabilization (GO:0048255)                                                                               | 2.282e-13  | 1.164e-9         | 202.02     | 5880.52        |
| 2     | G-quadruplex DNA unwinding (GO:0044806)                                                                       | 0.00001602 | 0.006289         | 317.46     | 3505.25        |
| 3     | RNA stabilization (GO:0043489)                                                                                | 4.129e-7   | 0.0002341        | 196.08     | 2882.36        |
| 4     | negative regulation of gene silencing by miRNA (GO:0060965)                                                   | 0.00003428 | 0.01093          | 222.22     | 2284.67        |
| 5     | positive regulation of nuclear-transcribed mRNA poly(A) tail shortening (GO:0060213)                          | 0.00004187 | 0.01257          | 202.02     | 2036.54        |
| 6     | regulation of nuclear-transcribed mRNA poly(A) tail shortening (GO:0060211)                                   | 0.00004187 | 0.01187          | 202.02     | 2036.54        |
| 7     | regulation of nuclear-transcribed mRNA catabolic process, deadenylation-dependent decay (GO:1900151)          | 0.00006917 | 0.01681          | 158.73     | 1520.46        |
| 8     | positive regulation of nuclear-transcribed mRNA catabolic process, deadenylation-dependent decay (GO:1900153) | 0.00009112 | 0.02114          | 138.89     | 1292.13        |
| 9     | 3'-UTR-mediated mRNA stabilization (GO:0070935)                                                               | 0.0001032  | 0.02290          | 130.72     | 1199.83        |
| 10    | negative regulation of translation (GO:0017148)                                                               | 1.204e-8   | 0.00001024       | 63.13      | 1151.22        |

GO Cellular Component 2018 ranked by EnrichR <sup>10</sup> combined score:

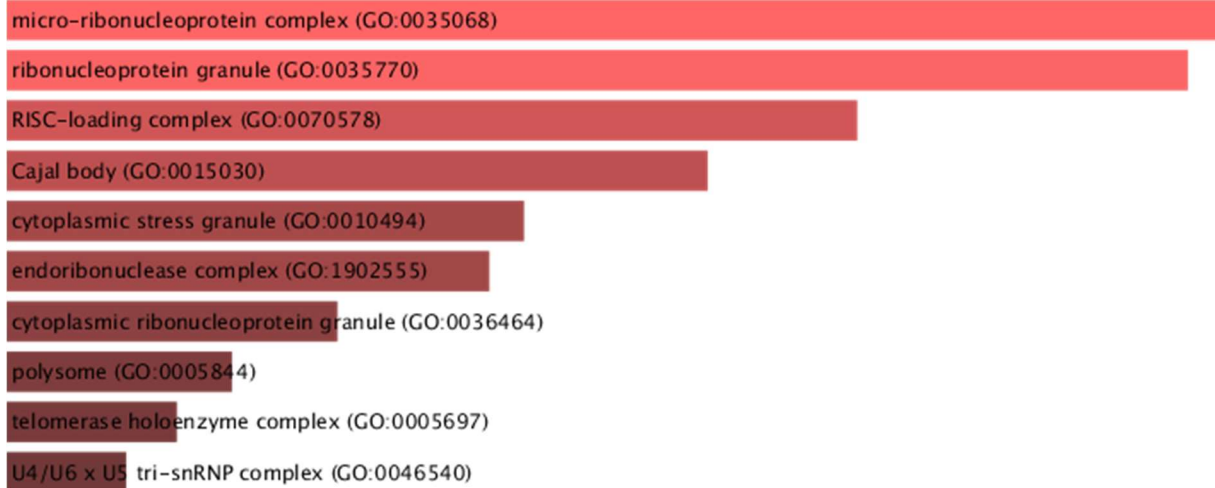

| Index | Name                                               | P-value    | Adjusted p-value | Odds Ratio | Combined score |
|-------|----------------------------------------------------|------------|------------------|------------|----------------|
| 1     | micro-ribonucleoprotein complex (GO:0035068)       | 0.006284   | 0.4004           | 158.73     | 804.73         |
| 2     | ribonucleoprotein granule (GO:0035770)             | 6.958e-7   | 0.0003103        | 55.56      | 787.68         |
| 3     | RISC-loading complex (GO:0070578)                  | 0.008072   | 0.4500           | 123.46     | 594.98         |
| 4     | Cajal body (GO:0015030)                            | 0.0004219  | 0.06272          | 65.36      | 507.89         |
| 5     | cytoplasmic stress granule (GO:0010494)            | 0.0006144  | 0.06851          | 54.20      | 400.81         |
| 6     | endoribonuclease complex (GO:1902555)              | 0.01164    | 0.5768           | 85.47      | 380.62         |
| 7     | cytoplasmic ribonucleoprotein granule (GO:0036464) | 0.00001405 | 0.003133         | 26.14      | 292.11         |
| 8     | polysome (GO:0005844)                              | 0.001446   | 0.1290           | 35.27      | 230.64         |
| 9     | telomerase holoenzyme complex (GO:0005697)         | 0.01962    | 0.7957           | 50.51      | 198.54         |
| 10    | U4/U6 x U5 tri-snRNP complex (GO:0046540)          | 0.02227    | 0.7641           | 44.44      | 169.09         |



**B) Proteins enriched in DND1 WT vs 1-235 dsRBD truncation interactome:**

(DND1) TRAP1, TNRC6B, HSPA1A, MATR3, MTHFD1, MEX3A, HSPA6, DDX17, HNRNPC

GO Molecular Function 2018 ranked by EnrichR <sup>10</sup> p-values:

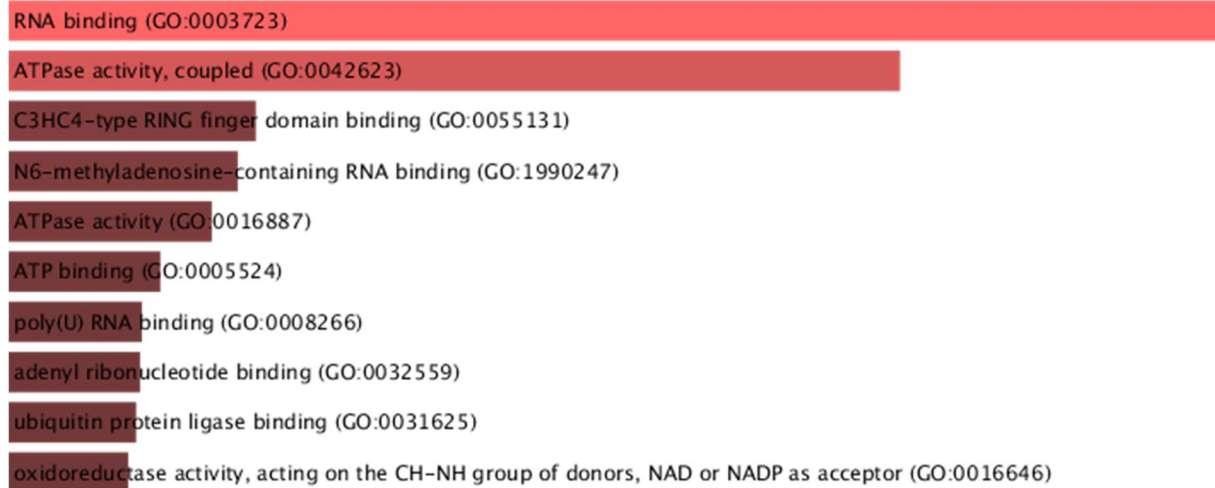

| Index | Name                                                                                               | P-value    | Adjusted p-value | Odds Ratio | Combined score |
|-------|----------------------------------------------------------------------------------------------------|------------|------------------|------------|----------------|
| 1     | C3HC4-type RING finger domain binding (GO:0055131)                                                 | 0.002997   | 1.000            | 333.33     | 1936.76        |
| 2     | N6-methyladenosine-containing RNA binding (GO:1990247)                                             | 0.003495   | 1.000            | 285.71     | 1616.10        |
| 3     | ATPase activity, coupled (GO:0042623)                                                              | 0.00001178 | 0.006779         | 63.83      | 724.41         |
| 4     | poly(U) RNA binding (GO:0008266)                                                                   | 0.007973   | 1.000            | 125.00     | 603.96         |
| 5     | oxidoreductase activity, acting on the CH-NH group of donors, NAD or NADP as acceptor (GO:0016646) | 0.008966   | 1.000            | 111.11     | 523.82         |
| 6     | poly-pyrimidine tract binding (GO:0008187)                                                         | 0.009957   | 0.9551           | 100.00     | 460.95         |
| 7     | AU-rich element binding (GO:0017091)                                                               | 0.01045    | 0.9255           | 95.24      | 434.37         |
| 8     | telomerase RNA binding (GO:0070034)                                                                | 0.01095    | 0.9001           | 90.91      | 410.42         |
| 9     | disordered domain specific binding (GO:0097718)                                                    | 0.01144    | 0.8781           | 86.96      | 388.73         |
| 10    | miRNA binding (GO:0035198)                                                                         | 0.01194    | 0.8588           | 83.33      | 369.00         |

**Supplementary Figure 7. Related to Figure 6. EnrichR <sup>10</sup> Gene Ontology analysis.** Proteins differentially present (multiple two-sided *t*-tests, FDR 10%) in WT vs mutant A) R98A; B) 1-235 DND1 HEK293T interactomes are listed, followed by GO-enrichment analysis, correcting for multiple comparisons as described in Chen et al. <sup>10</sup>.

Supplementary Figure 8

A

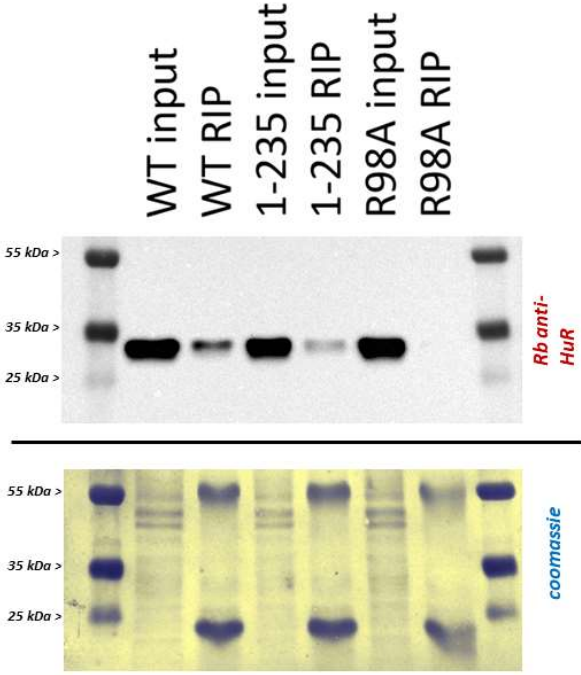

B

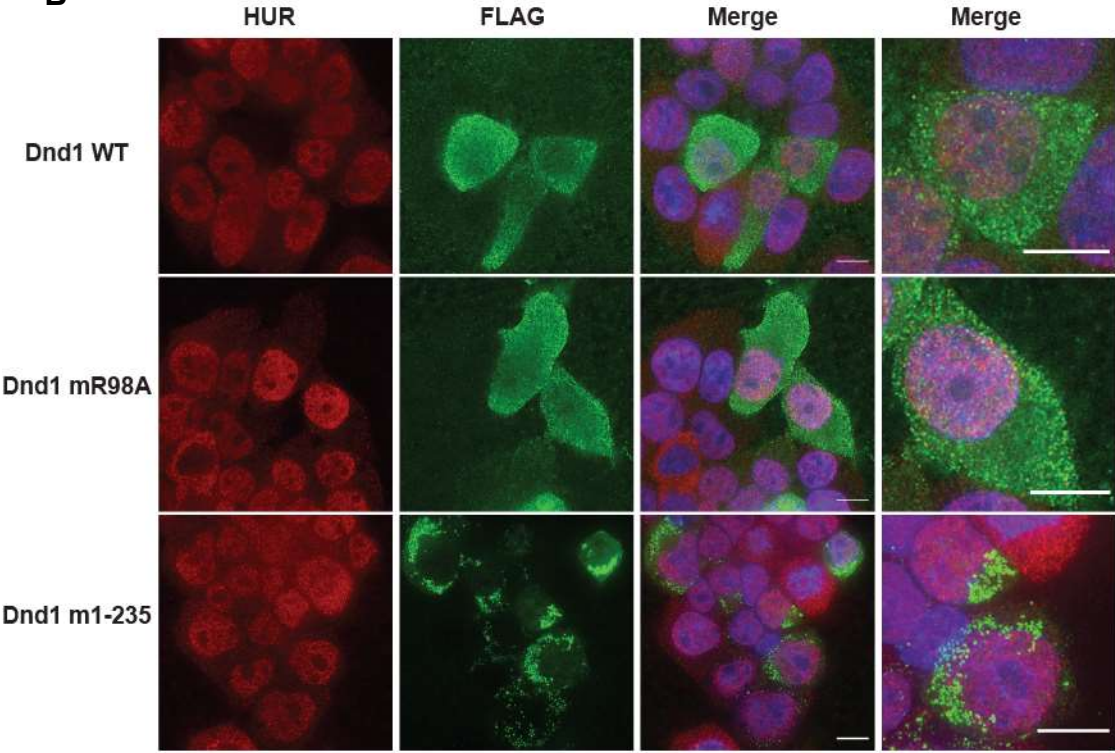

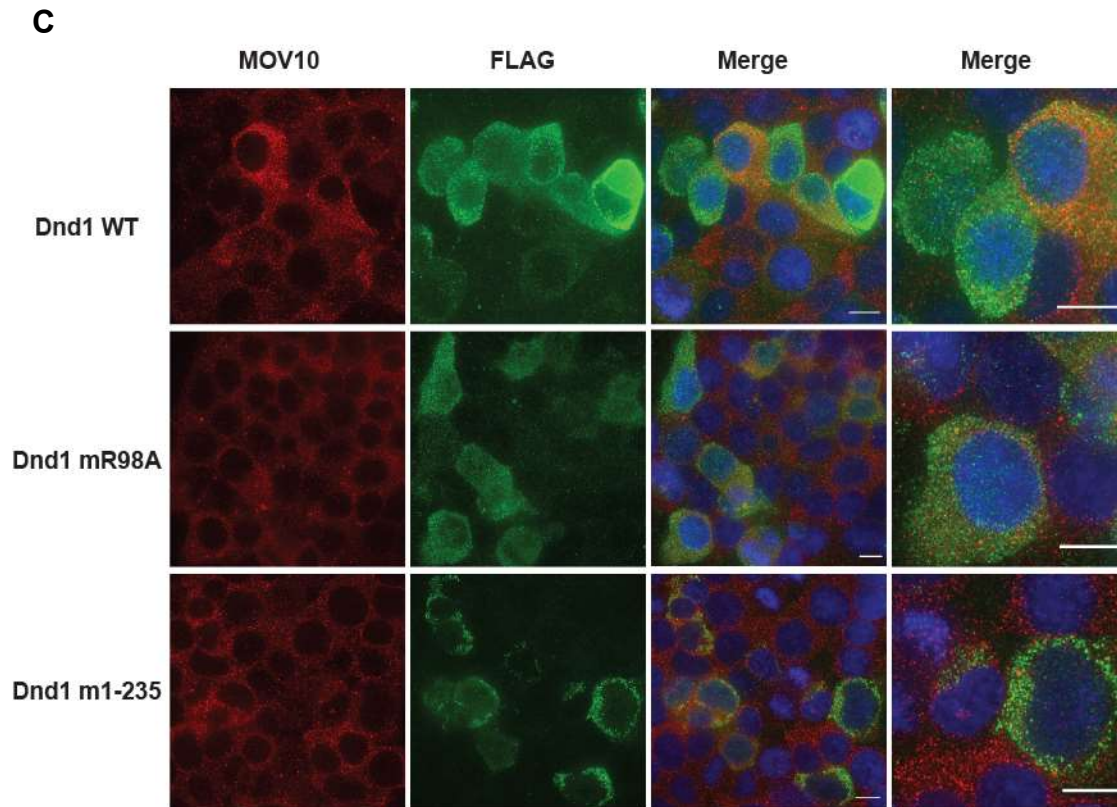

**Supplementary Figure 8. Related to Figure 6.**

**A) Western blot of ELAVL1/HuR** from our WT, R98A and 1-235 DND1 transfected HEK293T pulldowns shows enrichment in WT and 1-235 dsRBD pulldowns only. Representative blot from three independent transfections followed by pulldowns. Source data are provided as a Source Data file.

**B) Indirect immunofluorescence (IF) experiments in HEK293T** cells transiently transfected with plasmids encoding the indicated FLAG tagged Dnd1 proteins. HUR is shown in red, FLAG in green and DAPI stained nuclei in blue. Scale bar 10 $\mu$ m C) MOV10 is shown in red, FLAG in green and DAPI stained nuclei in blue. Scale bar 10 $\mu$ m. Representative images from three independent transfections.

**C) Indirect immunofluorescence (IF) experiments in HEK293T** cells transiently transfected with plasmids encoding the indicated FLAG tagged Dnd1 proteins MOV10 is shown in red, FLAG in green and DAPI stained nuclei in blue. Scale bar 10 $\mu$ m. Representative images from three independent transfections.

**Supplementary Table 1. Related to Figure 1, Supplementary Figure 2 and Methods. Primers.**

| Primer name                                      | Primer sequence                                                    |
|--------------------------------------------------|--------------------------------------------------------------------|
| Primers for qPCR                                 |                                                                    |
| SMN_f                                            | TGAGCTGTGAGAAGGGTGTT                                               |
| SMN_r                                            | ACAGCCATGTCCACCAGTTAG                                              |
| PMAIP_f                                          | CTG GGC TAT ATA CAG TCC TCA AA                                     |
| PMAIP_r                                          | AGT GAC TAC AAC CTA CAT TAA GAC A                                  |
| SRSF2_f                                          | AGA TCT AAA TGG TAA TCT GAA CCC A                                  |
| SRSF2_r                                          | CAA CAC GCC ACC TTA ACA GC                                         |
| SLC25A6_f                                        | CAG CCG ATT CCG TGT CTT GA                                         |
| SLC25A6_r                                        | GGG CTA GCG CTG AAG TAC AA                                         |
| Primers for protein constructs                   |                                                                    |
| hsDnd1_S1                                        | CGG GAT CCA TGC AGT CCA AGC GGG AT                                 |
| hsDnd1_As353                                     | CGG GAA TTC CTA TCA TTA CTG TTT AAC CAT GGT ACC TGC CTC            |
| hsDnd1_S12_BbsI_NcoI                             | CTA GAA GAC ACC ATG GAG AGG GTG AAT CCA GAG AAC AAG                |
| hsDnd1_S136_BbsI_NcoI                            | CTA GAA GAC ACC ATG GAG AAG TGT GAG CTG AGC GTT GAC                |
| hsDnd1_As139_Acc65I                              | GCT AGG TAC CTT ACT CAC ACT TCT CGG TGC TG                         |
| hsDnd1_As227_Acc65I                              | GCT AGG TAC CTT ACT GCT GGC GAA GTC GCT GCT TC                     |
| hsDnd1_As235_Acc65I                              | GCT AGG TAC CTT AGG ACC GCA AGA AGG GAC CCA C                      |
| Primers for protein mutations                    |                                                                    |
| Mut_Dnd1_M90A_f                                  | CGA GTT CCG CCT GGC GAT GAC CTT CAG                                |
| Mut_Dnd1_M90A_r                                  | CTG AAG GTC ATC GCC AGG CGG AAC TCG                                |
| Mut_Dnd1_R98A_f                                  | CAG CGG CCT GAA CGC CGG CTT CGC CTA TG                             |
| Mut_Dnd1_R98A_r                                  | CAT AGG CGA AGC CGG CGT TCA GGC CGC TG                             |
| Mut_Dnd1_T135A_f                                 | GTG TGC CGC AGC GCC GAG AAG TGT G                                  |
| Mut_Dnd1_T135A_r                                 | CAC ACT TCT CGG CGC TGC GGC ACA C                                  |
| Mut_Dnd1_K197A_f                                 | GCC ATG GCC AAA GCG GCC CTG GTG G                                  |
| Mut_Dnd1_K197A_r                                 | CCA CCA GGG CCG CTT TGG CCA TGG C                                  |
| Mut_Dnd1_W215F_f                                 | GTG GCT GTG GAG TTC CTC AAG CCA GAC C                              |
| Mut_Dnd1_W215F_r                                 | GGT CTG GCT TGA GGA ACT CCA CAG CCA C                              |
| Primers for luciferase assay reporter constructs |                                                                    |
| p27_sh3UTR_f_XhoI                                | GCT ACT CGA GGC CTC TAA AAG CGT TGG ATG                            |
| p27_sh3UTR_r_NotI                                | GCT AGC GGC CGC GTG CTA CAT AAA AGG TAA AAA CTA TAT ACA CAG        |
| TERT_3UTR_f_XhoI                                 | AAA ACT CGA GCG AGA GCA GAC ACC                                    |
| TERT_3UTR_r_NotI                                 | AAA AGC GGC CGC TTT TAC TCC CAC                                    |
| TERT_mut_UAUUU_f                                 | GCC CGG CTT TAT TTC CAC TCC CCA CAT AGG AAT AGT CCA TC             |
| TERT_mut_UAUUU_r                                 | GGG GAG TGG AAA TAA AGC CGG GCT CCT GGT GAG G                      |
| TERT_mut_UAUUU_UUUU_UAUUU_f                      | GCC CGG CTT TAT TTT TTT TAT TTC CAC TCC CCA CAT AGG AAT AGT CCA TC |
| TERT_mut_UAUUU_UUUU_UAUUU_r                      | GGG GAG TGG AAA TAA AAA AAA TAA AGC CGG GCT CCT GGT GAG G          |

**Supplementary Table 2. Related to Figure 2 and Supplementary Fig. 3. Summary of *in vitro* protein-RNA interaction studies of the Dnd1 individual and tandem RRM domains with different RNA oligos.**

| oligo     | RRM2 | RRM1 |                       | RRM12 |                       |
|-----------|------|------|-----------------------|-------|-----------------------|
|           | NMR  | NMR  | ITC ( $\mu\text{M}$ ) | NMR   | ITC ( $\mu\text{M}$ ) |
| UUUUUCC   | -    | -    |                       | +     | > 100                 |
| UUUUUAC   | -    | -    |                       | ++    | > 35                  |
| UUUUUU    | -    | +    | > 35                  | +++   |                       |
| CUUUUUUG  | -    | +    | > 54                  | +++   | 0.68                  |
| UCCUUUUUU |      |      |                       |       | 1.2                   |

'-' means lack of binding in an NMR titration. Increasing numbers of '+' indicate binding with increasing affinity as indicated by increasing chemical shift perturbations of backbone amide proton NMR signals in a  $^1\text{H}$ - $^{15}\text{N}$  HSQC spectrum (see Supplementary Fig. 3). NMR buffer: 20mM MES pH 6.6, 100 mM NaCl. ITC buffer: 100 mM  $\text{KHPO}_4/\text{KH}_2\text{PO}_4$  pH 6.6, 1mM 2-mercaptoethanol.

### Supplementary Table 3: NMR statistics

| Dnd1(12-235):CUUAAUUUG                      |                                              |                   |
|---------------------------------------------|----------------------------------------------|-------------------|
| NMR Restraints                              |                                              |                   |
| Distance Restraints                         |                                              |                   |
| Protein                                     | intramolecular                               | 5200              |
|                                             | intraresidual                                | 4947              |
|                                             | sequential ( i-j =1)                         | 942               |
|                                             | medium range (1< i-j <5)                     | 1313              |
|                                             | long range ( i-j >=5)                        | 1190              |
|                                             | hydrogen bonds <sup>a</sup>                  | 1423              |
|                                             | hydrogen bonds <sup>a</sup>                  | 79                |
| RNA                                         | intramolecular                               | 150               |
|                                             | intraresidual                                | 116               |
|                                             | sequential ( i-j =1)                         | 34                |
|                                             | medium range (1< i-j <5)                     | 0                 |
|                                             | long range ( i-j >=5)                        | 0                 |
|                                             | hydrogen bonds                               | 0                 |
| Complex                                     | intermolecular                               | 103               |
|                                             | long range ( i-j >=5)                        | 103               |
|                                             | hydrogen bonds                               | 0                 |
| Torsion Angles <sup>b</sup>                 |                                              |                   |
| Protein                                     | backbone                                     | 176               |
| RNA                                         | sugar pucker (DELTA)                         | 8                 |
| RDCs                                        |                                              |                   |
| Protein                                     | amide NH                                     | 127               |
| Energy Statistics <sup>c</sup>              |                                              |                   |
| Average distance constraint violations      |                                              |                   |
|                                             | 0.3-0.4 Å                                    | 10.3 +/- 2.5      |
|                                             | >0.4 Å                                       | 5.5 +/- 2.0       |
|                                             | Maximal (Å)                                  | 0.66 +/- 0.14     |
| Average angle constraint violations         |                                              |                   |
|                                             | >5 degree                                    | 3.0 +/- 1.2       |
|                                             | Maximal (degree)                             | 9.0 +/- 4.5       |
| Average RDC violations                      |                                              |                   |
|                                             | >5 Hz                                        | 5.2 +/- 1.2       |
|                                             | Maximal (Hz)                                 | 6.1 +/- 0.9       |
|                                             | RDC correlation coefficient                  | 0.96 +/- 0.01     |
|                                             | Q = rms(Dcalc-Dobs)/rms(Dobs) (%)            | 30.7 +/- 2.2      |
|                                             | Q normalized by tensor                       | 17.9 +/- 1.5      |
| Mean AMBER Violation Energy                 |                                              |                   |
|                                             | Constraint (kcal mol <sup>-1</sup> )         | 297.5 +/- 21.9    |
|                                             | Distance (kcal mol <sup>-1</sup> )           | 168.9 +/- 18.5    |
|                                             | Torsion (kcal mol <sup>-1</sup> )            | 10.7 +/- 2.4      |
|                                             | Alignment (kcal mol <sup>-1</sup> )          | 104.4 +/- 9.3     |
|                                             | Mean AMBER Energy (kcal mol <sup>-1</sup> )  | -7568.9 +/- 18.5  |
| Mean Deviation from ideal covalent geometry |                                              |                   |
|                                             | Bond Length (Å)                              | 0.0041 +/- 0.0000 |
|                                             | Bond Angle (degrees)                         | 1.511 +/- 0.009   |
| Ramachandran plot Statistics <sup>c,d</sup> |                                              |                   |
|                                             | Residues in most favoured regions (%)        | 82.1 +/- 1.9      |
|                                             | Residues in additionally allowed regions (%) | 15.3 +/- 2.1      |
|                                             | Residues in generously allowed regions (%)   | 2.0 +/- 0.8       |
|                                             | Residues in disallowed regions (%)           | 0.6 +/- 0.5       |
| RMSD to mean structure                      |                                              |                   |
| Protein Dnd1 RRM1 16-133                    |                                              |                   |
|                                             | Backbone atoms                               | 0.95 +/- 0.23     |
|                                             | Heavy atoms                                  | 1.23 +/- 0.20     |
| Protein Dnd1 RRM2 134-216                   |                                              |                   |
|                                             | Backbone atoms                               | 0.57 +/- 0.12     |
|                                             | Heavy atoms                                  | 0.92 +/- 0.12     |
| Protein Dnd1 RRM12 16-216                   |                                              |                   |
|                                             | Backbone atoms                               | 1.05 +/- 0.14     |
|                                             | Heavy atoms                                  | 1.36 +/- 0.13     |
| RNA UAUUU                                   |                                              |                   |
|                                             | Backbone atoms                               | 0.43 +/- 0.13     |
|                                             | Heavy atoms                                  | 0.60 +/- 0.18     |
| Complex RRM12 16-216;UAUUU                  |                                              |                   |
|                                             | Backbone atoms                               | 1.04 +/- 0.14     |
|                                             | Heavy atoms                                  | 1.26 +/- 0.13     |

RMSD, root-mean-square deviation

a Hydrogen bond constraints were identified from slow exchanging amide and imino protons in D<sub>2</sub>O

b Torsion angle based on TALOS+ predictions; sugar puckers based on homonuclear TOCSY

c Dnd1 RRM12, 16-216 Chain ID: A (Sequence Range:12-235); RNA CUUAAUUUG: 3-7, Chain ID: B (Sequence Range:1-8)

d Ramachandran plot, as defined by the program Procheck<sup>11</sup>.

**Supplementary Table 4. Related to Methods section. Reagents & resources table**

| REAGENT or RESOURCE                                      | SOURCE                  | IDENTIFIER            |
|----------------------------------------------------------|-------------------------|-----------------------|
| <b>Antibodies</b>                                        |                         |                       |
| FLAG-M2-HRP                                              | Sigma                   | A8592                 |
| HuR rabbit polyclonal antibody                           | ProteinTech             | 11910-1-AP            |
| MOV10 rabbit polyclonal antibody                         | ProteinTech             | 10370-1-AP            |
| Alexa fluor 488 donkey anti-mouse IgG                    | Life Technologies       | A21202                |
| Alexa fluor 546 donkey anti-rabbit IgG                   | Life Technologies       | A10040                |
| <b>Bacterial and Virus Strains</b>                       |                         |                       |
| Top10 competent cells                                    | This study              |                       |
| BL21(DE3) competent cells                                | This study / Novagen    |                       |
| <b>Biological Samples</b>                                |                         |                       |
| DMEM                                                     | Sigma                   | D6429                 |
| FBS                                                      | Sigma                   | F7524                 |
| OptiMEM                                                  | GIBCO                   | 31985047              |
| <b>Chemicals, Peptides, and Recombinant Proteins</b>     |                         |                       |
| TEV protease                                             | In-house produced       |                       |
| <b>Critical Commercial Assays</b>                        |                         |                       |
| Clarify™ Western ECL substrate                           | BioRad                  | 170-5061              |
| Dual-Glow Luciferase Assay System                        | Promega                 | E2920                 |
| <b>Deposited Data</b>                                    |                         |                       |
| Chemical Shifts                                          | BioMagResBank           | 34675                 |
| Structural Ensemble                                      | Protein Data Bank       | 7Q4L                  |
| <b>Experimental Models: Cell Lines</b>                   |                         |                       |
| HEK293T cell line                                        | ATCC                    | CRL-3216™             |
| <b>Oligonucleotides</b>                                  |                         |                       |
| CUUAUUUG RNA                                             | Dharmacon               |                       |
| selectively ribose-13C labeled RNA                       | This study              |                       |
| Oligonucleotides for cloning & site-directed mutagenesis | Microsynth              | Supplementary Table 1 |
| miRIDIAN miR-221-3p miRNA mimic                          | Dharmacon               | MIMAT0000278          |
| Scrambled miRNA mimic                                    | Dharmacon               | CN-001000-01-05       |
| <b>Recombinant DNA</b>                                   |                         |                       |
| pET-M11 vector                                           | EMBL                    |                       |
| pET-His-TEV                                              | EMBL                    |                       |
| psiCHECK2 vector                                         | Promega                 |                       |
| pCMV-SPORT6-hsDnd1 source plasmid                        | Source BioScience       | IRATp970F0747D        |
| pcFLAG_DNA3.1                                            | This study / Invitrogen |                       |
| <b>Software and Algorithms</b>                           |                         |                       |
| NMR data acquisition and processing                      | Topspin (Bruker)        | Version 2.1           |
| NMR data processing and relaxation analysis              | NMRPipe                 |                       |
| Spectral analysis                                        | NMRFAM-Sparky           | Version 1.1412        |
| Structure refinement                                     | AMBER 12                | Ff12SB force field    |
| Structure calculation                                    | CYANA                   | Version 3.98          |
| Peak picking, structure calculation                      | ATNOS-CANDID            | Version 3.1           |
| Statistical analyses                                     | PRISM                   | Version 7.04          |
| MS/MS sample protein identification                      | Mascot                  | Version 2.6.2         |
| MS/MS peptide and protein validation                     | Scaffold                | Version 4.8.9         |

## Supplementary References

1. Ding J, Hayashi MK *et al.* Crystal structure of the two-RRM domain of hnRNP A1 (UP1) complexed with single-stranded telomeric DNA. *Genes Dev* **13**: 1102-1115 (1999).
2. Notredame C, Higgins DG, Heringa J. T-coffee: a novel method for fast and accurate multiple sequence alignment. *J Mol Biol* **302**: 205–217 (2000).
3. Robert X, Gouet P. Deciphering key features in protein structures with the new ENDscript server. *Nucleic Acids Res* **42**: W320–W324 (2014).
4. Kelley LA, Mezulis S, Yates CM, Wass MN, Sternberg MJE. The Phyre2 web portal for protein modeling, prediction and analysis. *Nat Protoc* **10**: 845–858 (2015).
5. Ryter JM, Schultz SC. 1998. Molecular basis of double-stranded RNA-protein interactions: structure of a dsRNA-binding domain complexed with dsRNA. *EMBO J* **17**: 7505–13 (1998).
6. Kedde, M. *et al.* RNA-binding protein Dnd1 inhibits microRNA access to target mRNA. *Cell* **131**, 1273–86 (2007).
7. Delaglio, F. *et al.* NMRPipe: A multidimensional spectral processing system based on UNIX pipes. *J. Biomol. NMR* **6**, 277–293 (1995).
8. Aramini JM, Tubbs JL, *et al.* Structural basis of O6-alkylguanine recognition by a bacterial alkyltransferase-like DNA repair protein. *J Biol Chem* **285**: 13736–41 (2010).
9. Kay LE, Torchia DA, Bax A. Backbone dynamics of proteins as studied by nitrogen-15 inverse detected heteronuclear NMR spectroscopy: application to staphylococcal nuclease. *Biochemistry* **28**: 8972–8979 (1989)
10. Chen EY, Tan CM, Kou Y, Duan Q, Wang Z, Meirelles GV, Clark NR, Ma'ayan A. Enrichr: interactive and collaborative HTML5 gene list enrichment analysis tool. *BMC Bioinformatics* **14**: 128 (2013)
11. Laskowski, R., Rullmann, J. A., MacArthur, M., Kaptein, R. & Thornton, J. AQUA and PROCHECK-NMR: Programs for checking the quality of protein structures solved by NMR. *J. Biomol. NMR* **8**, 477–486 (1996).
