# Supplementary material for: The solution structure of Dead End bound to AU-rich RNA reveals an unusual mode of tandem RRM-RNA recognition required for mRNA regulation
Source: PubMed Central journal article supplement (PMC9537309; doi:10.1038/s41467-022-33552-x), 2022-10-06
Supplement: 41467_2022_33552_MOESM3_ESM.pdf [file 41467_2022_33552_MOESM3_ESM.pdf]

### **Descriptions of Additional of Supplementary data**

Supplementary Data 1 Legend: LC-MS/MS dataset of DND1 co-immunoprecipitations in HEK293T

Supplementary Data 2 Legend: Intra-RNA and Intermolecular restraints used to calculate the Dnd1 RRM12:CUUAUUUG complex ensemble
