# Supplementary material for: The solution structure of Dead End bound to AU-rich RNA reveals an unusual mode of tandem RRM-RNA recognition required for mRNA regulation
Source: PubMed Central journal article supplement (PMC9537309; doi:10.1038/s41467-022-33552-x), 2022-10-06
Supplement: 41467_2022_33552_MOESM5_ESM.pdf [file 41467_2022_33552_MOESM5_ESM.pdf]

## Supplementary Data 2

Related to Figures 3 and 4.

**Intra-RNA and Intermolecular restraints used to calculate the Dnd1 RRM12:CUUAAUUUG complex ensemble.**

| Intra-RNA restraints |          |      |           |          |        |  |
|----------------------|----------|------|-----------|----------|--------|--|
| Res1                 | Atom1    | Res2 | Atom2     | Distance | Weight |  |
| 1                    | RCYT H6  | 1    | RCYT H5   | 2.4      |        |  |
| 1                    | RCYT H6  | 1    | RCYT H1'  | 4.5      |        |  |
| 1                    | RCYT H6  | 1    | RCYT H3'  | 4.5      |        |  |
| 1                    | RCYT H6  | 1    | RCYT H2'  | 3.5      |        |  |
| 1                    | RCYT H6  | 1    | RCYT H5'  | 5        |        |  |
| 1                    | RCYT H6  | 1    | RCYT H5'' | 5        |        |  |
| 1                    | RCYT H6  | 1    | RCYT H4'  | 4.5      |        |  |
| 1                    | RCYT H5  | 1    | RCYT H5'  | 5        |        |  |
| 1                    | RCYT H5  | 1    | RCYT H5'' | 5        |        |  |
| 1                    | RCYT H5  | 1    | RCYT H3'  | 5.5      |        |  |
| 1                    | RCYT H5  | 1    | RCYT H2'  | 5        |        |  |
| 1                    | RCYT H1' | 1    | RCYT H5'  | 5        |        |  |
| 1                    | RCYT H1' | 1    | RCYT H5'' | 5        |        |  |
| 1                    | RCYT H1' | 1    | RCYT H4'  | 4.5      |        |  |
| 1                    | RCYT H1' | 1    | RCYT H2'  | 4.5      |        |  |
| 1                    | RCYT H1' | 1    | RCYT H3'  | 4.5      |        |  |
| 1                    | RCYT H2' | 1    | RCYT H5'  | 5        |        |  |
| 1                    | RCYT H2' | 1    | RCYT H5'' | 5        |        |  |
| 1                    | RCYT H2' | 1    | RCYT H4'  | 4.5      |        |  |
| 1                    | RCYT H3' | 1    | RCYT H5'  | 4.5      |        |  |
| 1                    | RCYT H3' | 1    | RCYT H5'' | 4.5      |        |  |
| 1                    | RCYT H3' | 1    | RCYT H4'  | 4.5      |        |  |
| 1                    | RCYT H3' | 1    | RCYT H2'  | 4.0      |        |  |
| 1                    | RCYT H4' | 1    | RCYT H5'  | 4        |        |  |
| 1                    | RCYT H4' | 1    | RCYT H5'' | 4        |        |  |
| 1                    | RCYT H6  | 2    | URA H5''  | 6        |        |  |
| 1                    | RCYT H1' | 2    | URA H5'   | 6        |        |  |
| 1                    | RCYT H1' | 2    | URA H5''  | 6        |        |  |
| 1                    | RCYT H3' | 2    | URA H6    | 5        |        |  |
| 1                    | RCYT H3' | 2    | URA H5    | 5        |        |  |
| 1                    | RCYT H3' | 2    | URA H1'   | 6        |        |  |
| 1                    | RCYT H6  | 2    | URA H6    | 5.0      |        |  |
| 1                    | RCYT H5  | 2    | URA H5    | 5.0      |        |  |
| 1                    | RCYT H1' | 2    | URA H6    | 5.0      |        |  |
| 1                    | RCYT H4' | 2    | URA H5''  | 5        |        |  |
| 2                    | URA H6   | 2    | URA H1'   | 4.5      |        |  |
| 2                    | URA H6   | 2    | URA H2'   | 4.0      |        |  |
| 2                    | URA H6   | 2    | URA H3'   | 4.5      |        |  |
| 2                    | URA H6   | 2    | URA H4'   | 4.5      |        |  |
| 2                    | URA H6   | 2    | URA H5    | 2.4      |        |  |
| 2                    | URA H6   | 2    | URA H5'   | 4.5      |        |  |
| 2                    | URA H6   | 2    | URA H5''  | 4.5      |        |  |
| 2                    | URA H5   | 2    | URA H3'   | 4.5      |        |  |
| 2                    | URA H5   | 2    | URA H2'   | 4.5      |        |  |
| 2                    | URA H1'  | 2    | URA H5'   | 5        |        |  |
| 2                    | URA H1'  | 2    | URA H5''  | 5        |        |  |
| 2                    | URA H1'  | 2    | URA H2'   | 4.0      |        |  |
| 2                    | URA H1'  | 2    | URA H4'   | 4        |        |  |
| 2                    | URA H1'  | 2    | URA H3'   | 4        |        |  |
| 2                    | URA H2'  | 2    | URA H3'   | 3.5      |        |  |
| 2                    | URA H3'  | 2    | URA H5'   | 4.5      |        |  |
| 2                    | URA H3'  | 2    | URA H5''  | 4.5      |        |  |
| 2                    | URA H3'  | 2    | URA H4'   | 4.5      |        |  |
| 2                    | URA H3'  | 2    | URA H5    | 4.5      |        |  |
| 2                    | URA H4'  | 2    | URA H5'   | 3.5      |        |  |
| 2                    | URA H4'  | 2    | URA H5''  | 3.5      |        |  |
| 2                    | URA H4'  | 2    | URA H3'   | 3.5      |        |  |
| 2                    | URA H5'  | 2    | URA H5''  | 3.5      |        |  |
| 3                    | URA H6   | 3    | URA H5'   | 4.5      |        |  |
| 3                    | URA H6   | 3    | URA H5''  | 5        |        |  |
| 3                    | URA H6   | 3    | URA H2'   | 4        |        |  |
| 3                    | URA H6   | 3    | URA H3'   | 4.5      |        |  |
| 3                    | URA H6   | 3    | URA H5    | 2.4      |        |  |
| 3                    | URA H6   | 3    | URA H1'   | 4.5      |        |  |
| 3                    | URA H1'  | 3    | URA H5''  | 5        |        |  |
| 3                    | URA H1'  | 3    | URA H5'   | 5        |        |  |
| 3                    | URA H1'  | 3    | URA H2'   | 4.0      |        |  |
| 3                    | URA H1'  | 3    | URA H4'   | 4.5      |        |  |
| 3                    | URA H1'  | 3    | URA H3'   | 4.5      |        |  |
| 3                    | URA H2'  | 3    | URA H5'   | 4.5      |        |  |
| 3                    | URA H2'  | 3    | URA H5''  | 4.5      |        |  |

## Supplementary Data 2

|   |      |     |   |      |      |     |
|---|------|-----|---|------|------|-----|
| 3 | URA  | H3' | 3 | URA  | H5'  | 4.5 |
| 3 | URA  | H3' | 3 | URA  | H5'' | 4.5 |
| 3 | URA  | H3' | 3 | URA  | H2'  | 4.0 |
| 3 | URA  | H3' | 3 | URA  | H4'  | 4.0 |
| 3 | URA  | H4' | 3 | URA  | H5'  | 3.5 |
| 3 | URA  | H4' | 3 | URA  | H5'' | 3.5 |
| 3 | URA  | H1' | 4 | RADE | H8   | 5   |
| 3 | URA  | H3' | 4 | RADE | H8   | 5   |
| 3 | URA  | H4' | 4 | RADE | H8   | 5   |
| 3 | URA  | H4' | 4 | RADE | H5'  | 5   |
| 3 | URA  | H4' | 4 | RADE | H5'' | 5   |
| 4 | RADE | H2' | 3 | URA  | H1'  | 5   |
| 4 | RADE | H8  | 4 | RADE | H1'  | 4.5 |
| 4 | RADE | H8  | 4 | RADE | H2'  | 3.5 |
| 4 | RADE | H8  | 4 | RADE | H3'  | 4.5 |
| 4 | RADE | H8  | 4 | RADE | H5'  | 5   |
| 4 | RADE | H8  | 4 | RADE | H5'' | 5   |
| 4 | RADE | H1' | 4 | RADE | H2'  | 4.5 |
| 4 | RADE | H1' | 4 | RADE | H4'  | 4.5 |
| 4 | RADE | H1' | 4 | RADE | H3'  | 4.5 |
| 4 | RADE | H3' | 4 | RADE | H5'  | 4.5 |
| 4 | RADE | H3' | 4 | RADE | H5'' | 4.5 |
| 4 | RADE | H3' | 4 | RADE | H4'  | 4.5 |
| 4 | RADE | H3' | 4 | RADE | H2'  | 4.0 |
| 4 | RADE | H1' | 5 | URA  | H2'  | 5.0 |
| 4 | RADE | H1' | 5 | URA  | H5   | 3.5 |
| 4 | RADE | H1' | 5 | URA  | H6   | 3.5 |
| 4 | RADE | H3' | 5 | URA  | H6   | 5   |
| 4 | RADE | H8  | 5 | URA  | H5   | 5   |
| 5 | URA  | H6  | 5 | URA  | H1'  | 4.5 |
| 5 | URA  | H6  | 5 | URA  | H5   | 2.4 |
| 5 | URA  | H6  | 5 | URA  | H2'  | 3.5 |
| 5 | URA  | H6  | 5 | URA  | H4'  | 5   |
| 5 | URA  | H6  | 5 | URA  | H3'  | 4.5 |
| 5 | URA  | H5  | 5 | URA  | H2'  | 5   |
| 5 | URA  | H1' | 5 | URA  | H2'  | 4.0 |
| 5 | URA  | H1' | 5 | URA  | H3'  | 4.0 |
| 5 | URA  | H1' | 5 | URA  | H5   | 5.5 |
| 5 | URA  | H2' | 6 | URA  | H5   | 4.5 |
| 5 | URA  | H2' | 6 | URA  | H6   | 4.5 |
| 5 | URA  | H3' | 6 | URA  | H5   | 4.5 |
| 6 | URA  | H6  | 6 | URA  | H1'  | 4.5 |
| 6 | URA  | H6  | 6 | URA  | H5   | 2.4 |
| 6 | URA  | H6  | 6 | URA  | H2'  | 4.5 |
| 6 | URA  | H6  | 6 | URA  | H3'  | 4.5 |
| 6 | URA  | H6  | 6 | URA  | H4'  | 6   |
| 6 | URA  | H6  | 6 | URA  | H5'  | 5   |
| 6 | URA  | H6  | 6 | URA  | H5'' | 6   |
| 6 | URA  | H5  | 6 | URA  | H4'  | 6   |
| 6 | URA  | H5  | 6 | URA  | H2'  | 5   |
| 6 | URA  | H1' | 6 | URA  | H5'  | 5   |
| 6 | URA  | H1' | 6 | URA  | H5'' | 5   |
| 6 | URA  | H1' | 6 | URA  | H4'  | 5   |
| 6 | URA  | H1' | 6 | URA  | H3'  | 5   |
| 6 | URA  | H1' | 6 | URA  | H2'  | 4.5 |
| 6 | URA  | H2' | 6 | URA  | H5   | 4.5 |
| 5 | URA  | H3' | 6 | URA  | H5'  | 4.5 |
| 5 | URA  | H3' | 6 | URA  | H5'' | 4.5 |
| 6 | URA  | H1' | 7 | URA  | H5'' | 5.5 |
| 7 | URA  | H6  | 7 | URA  | H2'  | 4   |
| 7 | URA  | H6  | 6 | URA  | H3'  | 5   |
| 7 | URA  | H6  | 7 | URA  | H5   | 2.4 |
| 7 | URA  | H6  | 7 | URA  | H1'  | 4.5 |
| 7 | URA  | H5  | 7 | URA  | H2'  | 5   |
| 7 | URA  | H5  | 6 | URA  | H3'  | 5.5 |
| 7 | URA  | H1' | 7 | URA  | H2'  | 4.5 |
| 7 | URA  | H1' | 7 | URA  | H5   | 4.5 |
| 7 | URA  | H2' | 7 | URA  | H5'  | 5   |
| 7 | URA  | H2' | 7 | URA  | H5'' | 4.5 |
| 7 | URA  | H2' | 8 | RGUA | H8   | 6   |
| 7 | URA  | H6  | 8 | RGUA | H1'  | 4.5 |
| 8 | RGUA | H8  | 8 | RGUA | H1'  | 4.5 |
| 8 | RGUA | H8  | 8 | RGUA | H3'  | 4   |
| 8 | RGUA | H8  | 8 | RGUA | H4'  | 5   |
| 8 | RGUA | H8  | 7 | URA  | H4'  | 6   |
| 8 | RGUA | H1' | 8 | RGUA | H5'' | 5   |
| 8 | RGUA | H1' | 8 | RGUA | H5'  | 5   |

2

## Supplementary Data 2

### Intermolecular restraints

| Res1 | Atom1 | Res2 | Atom2       | Distance |
|------|-------|------|-------------|----------|
| 1    | RCYT  | H1'  | 130 LEU QD1 | 5        |
| 2    | URA   | H6   | 130 LEU QD1 | 5        |
| 3    | URA   | H6   | 130 LEU QD1 | 5        |
| 2    | URA   | H6   | 130 LEU QD2 | 5        |
| 3    | URA   | H6   | 130 LEU QD2 | 5        |
| 2    | URA   | H5   | 130 LEU QD1 | 6        |
| 2    | URA   | H5   | 130 LEU QD2 | 6        |
| 2    | URA   | H1'  | 130 LEU QD1 | 5        |
| 3    | URA   | H5   | 130 LEU QD1 | 5        |
| 2    | URA   | H1'  | 130 LEU QD2 | 5        |
| 3    | URA   | H5   | 130 LEU QD2 | 5        |
| 2    | URA   | H2'  | 130 LEU QD1 | 4        |
| 1    | RCYT  | H2'  | 130 LEU QD1 | 4        |
| 2    | URA   | H2'  | 130 LEU QD2 | 4        |
| 2    | URA   | H2'  | 130 LEU HG  | 5        |
| 1    | RCYT  | H2'  | 130 LEU QD2 | 4        |
| 2    | URA   | H3'  | 130 LEU QD1 | 5        |
| 2    | URA   | H3'  | 130 LEU QD2 | 6        |
| 3    | URA   | H1'  | 130 LEU QD1 | 5        |
| 3    | URA   | H1'  | 130 LEU QD2 | 5        |
| 3    | URA   | H4'  | 130 LEU QD2 | 5        |
| 3    | URA   | H4'  | 130 LEU QD1 | 5        |
| 3    | URA   | H1'  | 61 PHE HZ   | 6        |
| 3    | URA   | H5'  | 64 ARG QG   | 5        |
| 3    | URA   | H5'' | 64 ARG QG   | 6        |
| 3    | URA   | H5'' | 64 ARG QD   | 6        |
| 4    | RADE  | H2   | 135 THR QG2 | 5        |
| 4    | RADE  | H2   | 135 THR HB  | 6        |
| 4    | RADE  | H2   | 90 MET QE   | 6        |
| 4    | RADE  | H2   | 61 PHE QD   | 6        |
| 4    | RADE  | H2   | 102 TYR QE  | 3.5      |
| 4    | RADE  | H2   | 102 TYR QD  | 4        |
| 4    | RADE  | H8   | 61 PHE HZ   | 6        |
| 4    | RADE  | H8   | 61 PHE QE   | 6        |
| 4    | RADE  | H1'  | 61 PHE QE   | 6        |
| 4    | RADE  | H1'  | 61 PHE HZ   | 6        |
| 4    | RADE  | H1'  | 100 PHE QD  | 6        |
| 4    | RADE  | H1'  | 100 PHE QE  | 6        |
| 4    | RADE  | H2'  | 100 PHE QE  | 6        |
| 4    | RADE  | H4'  | 100 PHE QE  | 5        |
| 4    | RADE  | H5'' | 100 PHE QE  | 5        |
| 4    | RADE  | H5'' | 100 PHE QE  | 5        |
| 4    | RADE  | H1'  | 90 MET QE   | 5        |
| 4    | RADE  | H3'  | 100 PHE QE  | 5        |
| 5    | URA   | H6   | 137 LYS QD  | 4        |
| 5    | URA   | H5   | 137 LYS QD  | 5        |
| 5    | URA   | H1'  | 137 LYS QD  | 6        |
| 5    | URA   | H6   | 137 LYS QG  | 6        |
| 5    | URA   | H5   | 137 LYS QG  | 6        |
| 5    | URA   | H5   | 135 THR QG2 | 6        |
| 5    | URA   | H6   | 90 MET QE   | 5        |
| 5    | URA   | H1'  | 102 TYR QR  | 4.5      |
| 5    | URA   | H4'  | 102 TYR QR  | 5        |
| 5    | URA   | H1'  | 100 PHE QE  | 4.5      |
| 5    | URA   | H1'  | 189 HIS HE1 | 6        |
| 5    | URA   | H4'  | 100 PHE QE  | 4.5      |
| 5    | URA   | H2'  | 100 PHE QE  | 5.5      |
| 5    | URA   | H4'  | 90 MET QE   | 5        |
| 5    | URA   | H2'  | 90 MET QE   | 5        |
| 5    | URA   | H1'  | 90 MET QE   | 3.5      |
| 6    | URA   | H3'  | 36 VAL QG1  | 6        |
| 6    | URA   | H6   | 193 ALA QB  | 5        |
| 6    | URA   | H5   | 193 ALA QB  | 4.5      |
| 6    | URA   | H1'  | 193 ALA QB  | 3.5      |
| 6    | URA   | H5   | 215 TRP HH2 | 4        |
| 6    | URA   | H6   | 215 TRP HH2 | 6        |
| 6    | URA   | H1'  | 197 LYS HG3 | 5        |
| 6    | URA   | H1'  | 197 LYS HG2 | 5        |
| 6    | URA   | H1'  | 197 LYS HD3 | 4        |
| 6    | URA   | H1'  | 197 LYS HD2 | 4        |
| 6    | URA   | H1'  | 197 LYS QB  | 4        |
| 6    | URA   | H1'  | 197 LYS QE  | 3.5      |
| 6    | URA   | H1'  | 197 LYS HA  | 6        |
| 6    | URA   | H1'  | 194 MET QE  | 3.5      |
| 6    | URA   | H4'  | 194 MET QE  | 4        |
| 6    | URA   | H1'  | 194 MET HA  | 6        |
| 6    | URA   | H2'  | 197 LYS QE  | 5        |
| 6    | URA   | H4'  | 197 LYS QE  | 4        |
| 7    | URA   | H4'  | 36 VAL QG1  | 5        |

## Supplementary Data 2

|   |      |     |     |     |      |     |
|---|------|-----|-----|-----|------|-----|
| 7 | URA  | H3' | 37  | ASN | HD21 | 5   |
| 7 | URA  | H5' | 36  | VAL | QG1  | 5   |
| 7 | URA  | H5' | 39  | GLN | QG   | 5   |
| 7 | URA  | H5' | 36  | VAL | HB   | 6   |
| 7 | URA  | H5  | 92  | THR | QG2  | 5   |
| 7 | URA  | H6  | 92  | THR | QG2  | 5   |
| 7 | URA  | H4' | 197 | LYS | QE   | 6   |
| 7 | URA  | H5' | 197 | LYS | QE   | 6   |
| 7 | URA  | H5" | 197 | LYS | QE   | 6   |
| 8 | RGUA | H8  | 93  | PHE | QE   | 5   |
| 8 | RGUA | H8  | 92  | THR | QG2  | 6.0 |
| 8 | RGUA | H1' | 92  | THR | QG2  | 5.0 |
| 8 | RGUA | H3' | 92  | THR | QG2  | 6.0 |
| 8 | RGUA | H3' | 93  | PHE | QE   | 5   |
